# Supplementary material for: Deep neural network prediction of genome-wide transcriptome signatures – beyond the Black-box
Source: PubMed Central journal article supplement (PMC8866467; doi:10.1038/s41540-022-00218-9), 2022-02-23
Supplement: 41540_2022_218_MOESM1_ESM.pdf [file 41540_2022_218_MOESM1_ESM.pdf]

## Supplementary material 1: Analysis of prediction power on individual human tissues in GTEx data

To assert how well the gene regulatory patterns of different human tissues were learnt during the training on the ARCHS4 data, we used the RNA-Seq data of the GTEx resource, V8 (downloaded the 8:th of November 2021). We extracted gene counts data corresponding to 54 different human tissues, and separated the gene counts into matrices representing the same TFs and target genes as in the training data. The data were log-transformed to follow the same procedure as in the data preprocessing of the ARCHS4 data.

Next, we used the the deep neural network of two hidden layers with 250 nodes each, together with the gene expression of the TFs, to predict the gene expression of the target genes. We used four measures to assess the performance of each tissue: the median and mean of the R2 coefficients respective to each target gene, and the median and mean of the Spearman correlation of each target gene (Supplementary table 1). We found the model to perform well on next-to-all tested human tissues, with the prediction performance on the tissue “Testis” having the worst performance (median R2 = 0.446). The GTEx samples that were annotated as “Cells\_Cultured\_Fibroblasts” were associated with the highest performance in the model predictions, which we speculate to resonate well with the relatively high proportion of cell line-derived material in the ARCHS4 training data.

**Supplementary table 1: Performance on individual tissues in the GTEx data.**

|                                         | Median R2 | Mean R2 | Median Spearman Rho | Mean Spearman Rho |
|-----------------------------------------|-----------|---------|---------------------|-------------------|
| Testis                                  | 0.446     | 0.452   | 0.762               | 0.765             |
| Pituitary                               | 0.666     | 0.666   | 0.829               | 0.829             |
| Spleen                                  | 0.675     | 0.675   | 0.827               | 0.827             |
| Small_Intestine_Terminal_Ileum          | 0.677     | 0.680   | 0.832               | 0.833             |
| Minor_Salivary_Gland                    | 0.678     | 0.676   | 0.829               | 0.829             |
| Kidney_Cortex                           | 0.688     | 0.687   | 0.831               | 0.831             |
| Prostate                                | 0.688     | 0.688   | 0.836               | 0.836             |
| Kidney_Medulla                          | 0.688     | 0.690   | 0.833               | 0.834             |
| Colon_Transverse                        | 0.691     | 0.692   | 0.834               | 0.835             |
| Brain_Cerebellum                        | 0.693     | 0.692   | 0.834               | 0.834             |
| Brain_Hypothalamus                      | 0.694     | 0.696   | 0.837               | 0.837             |
| Skin_Not_Sun_Exposed_(Suprapubic)       | 0.695     | 0.693   | 0.833               | 0.833             |
| Skin_Sun_Exposed_(Lower_leg)            | 0.695     | 0.694   | 0.833               | 0.833             |
| Brain_Cerebellar_Hemisphere             | 0.696     | 0.696   | 0.834               | 0.834             |
| Thyroid                                 | 0.696     | 0.695   | 0.836               | 0.836             |
| Esophagus_Mucosa                        | 0.697     | 0.696   | 0.832               | 0.832             |
| Pancreas                                | 0.697     | 0.697   | 0.833               | 0.833             |
| Vagina                                  | 0.697     | 0.696   | 0.835               | 0.835             |
| Brain_Nucleus_accumbens_(basal_ganglia) | 0.697     | 0.701   | 0.838               | 0.837             |
| Stomach                                 | 0.697     | 0.699   | 0.835               | 0.836             |
| Lung                                    | 0.698     | 0.697   | 0.841               | 0.841             |
| Fallopian_Tube                          | 0.700     | 0.697   | 0.839               | 0.837             |
| Ovary                                   | 0.702     | 0.701   | 0.834               | 0.834             |
| Brain_Caudate_(basal_ganglia)           | 0.703     | 0.703   | 0.839               | 0.839             |

|                                        |       |       |       |       |
|----------------------------------------|-------|-------|-------|-------|
| Cervix_Ectocervix                      | 0.703 | 0.702 | 0.838 | 0.836 |
| Nerve_Tibial                           | 0.705 | 0.705 | 0.837 | 0.837 |
| Liver                                  | 0.706 | 0.706 | 0.832 | 0.832 |
| Brain_Spinal_cord_(cervical_c-1)       | 0.707 | 0.708 | 0.839 | 0.839 |
| Cervix_Endocervix                      | 0.708 | 0.703 | 0.840 | 0.839 |
| Adrenal_Gland                          | 0.708 | 0.708 | 0.836 | 0.836 |
| Brain_Cortex                           | 0.708 | 0.707 | 0.843 | 0.843 |
| Brain_Putamen_(basal_ganglia)          | 0.709 | 0.712 | 0.840 | 0.840 |
| Brain_Hippocampus                      | 0.710 | 0.710 | 0.842 | 0.842 |
| Brain_Substantia_nigra                 | 0.711 | 0.711 | 0.841 | 0.841 |
| Breast_Mammary_Tissue                  | 0.711 | 0.711 | 0.842 | 0.842 |
| Brain_Frontal_Cortex_(BA9)             | 0.713 | 0.713 | 0.844 | 0.843 |
| Brain_Amygdala                         | 0.714 | 0.715 | 0.843 | 0.843 |
| Brain_Anterior_cingulate_cortex_(BA24) | 0.714 | 0.713 | 0.844 | 0.843 |
| Uterus                                 | 0.715 | 0.714 | 0.839 | 0.839 |
| Bladder                                | 0.716 | 0.712 | 0.842 | 0.840 |
| Colon_Sigmoid                          | 0.716 | 0.714 | 0.842 | 0.841 |
| Adipose_Visceral_(Omentum)             | 0.721 | 0.720 | 0.843 | 0.843 |
| Heart_Atrial_Appendage                 | 0.722 | 0.722 | 0.842 | 0.842 |
| Esophagus_Gastroesophageal_Junction    | 0.724 | 0.723 | 0.844 | 0.844 |
| Artery_Aorta                           | 0.725 | 0.724 | 0.841 | 0.841 |
| Artery_Coronary                        | 0.725 | 0.723 | 0.843 | 0.843 |
| Esophagus_Muscularis                   | 0.725 | 0.723 | 0.844 | 0.843 |
| Adipose_Subcutaneous                   | 0.731 | 0.730 | 0.845 | 0.845 |
| Artery_Tibial                          | 0.732 | 0.731 | 0.842 | 0.841 |
| Cells_EBV-transformed_lymphocytes      | 0.732 | 0.733 | 0.829 | 0.829 |
| Whole_Blood                            | 0.734 | 0.734 | 0.829 | 0.829 |
| Heart_Left_Ventricle                   | 0.737 | 0.738 | 0.844 | 0.844 |
| Muscle_Skeletal                        | 0.749 | 0.748 | 0.844 | 0.844 |
| Cells_Cultured_fibroblasts             | 0.764 | 0.763 | 0.845 | 0.845 |

## Supplementary material 2:

## DoRothEA results :

TFs\_to\_targets\_250\_250\_250.csv

AUC: 0.6750707998568443, AP: 0.9556066922259717

n corr: 2897, n tot: 4498

TFs\_to\_targets\_250.csv

AUC: 0.7337516921943805, AP: 0.965824645784112

n corr: 3006, n tot: 4498

TFs\_to\_targets\_100\_100\_100.csv

AUC: 0.684311737215828, AP: 0.9547763076679238

n corr: 2870, n tot: 4498

TFs\_to\_targets\_1000.csv

AUC: 0.6742927794519624, AP: 0.9566777403658694

n corr: 2905, n tot: 4498

TFs\_to\_targets\_spearmanr.csv

AUC: 0.9698426324061059, AP: 0.9969860959534833

n corr: 3829, n tot: 4498

TFs\_to\_targets\_100.csv

AUC: 0.6937173555605118, AP: 0.9580971287933397

n corr: 2934, n tot: 4498

TFs\_to\_targets\_1000\_1000\_1000.csv

AUC: 0.6757755566735997, AP: 0.9554574210114752

n corr: 2900, n tot: 4498

TFs\_to\_targets\_500\_500\_500.csv

AUC: 0.6737760442330534, AP: 0.9560350975080136

n corr: 2888, n tot: 4498

TFs\_to\_targets\_50.csv

AUC: 0.7236296467268681, AP: 0.9607887242081521

n corr: 3021, n tot: 4498

TFs\_to\_targets\_no\_hidden.csv

AUC: 0.6645383486257566, AP: 0.9534499393091929

n corr: 2554, n tot: 4498

TFs\_to\_targets\_50\_50\_50.csv

AUC: 0.7002903312810884, AP: 0.9584955781749502

n corr: 2978, n tot: 4498

TFs\_to\_targets\_50\_50.csv

AUC: 0.7022697448611752, AP: 0.9572874013020993

n corr: 3020, n tot: 4498

TFs\_to\_targets\_500\_500.csv

AUC: 0.6295617929739571, AP: 0.9489232635411091  
n corr: 2784, n tot: 4498

TFs\_to\_targets\_250\_250.csv  
AUC: 0.7429576186351448, AP: 0.9675751600306878  
n corr: 3021, n tot: 4498

TFs\_to\_targets\_1000\_1000.csv  
AUC: 0.7006041328443907, AP: 0.9594967900793749  
n corr: 2863, n tot: 4498

TFs\_to\_targets\_500.csv  
AUC: 0.6755421505521351, AP: 0.9561587324828115  
n corr: 2914, n tot: 4498

TFs\_to\_targets\_100\_100.csv  
AUC: 0.682758289807414, AP: 0.9570792843846412  
n corr: 2911, n tot: 4498

## **TRRUST results:**

Tfs\_to\_targets\_250\_250\_250.csv  
AUC: 0.670909527646913, AP: 0.8138270082804918  
n corr: 1957, n tot: 3458

Tfs\_to\_targets\_250.csv  
AUC: 0.7020704190428961, AP: 0.8283017951663989  
n corr: 1985, n tot: 3458

Tfs\_to\_targets\_100\_100\_100.csv  
AUC: 0.6397811802628317, AP: 0.7790028662376707  
n corr: 1933, n tot: 3458

Tfs\_to\_targets\_1000.csv  
AUC: 0.6563088891643938, AP: 0.8020568284016005  
n corr: 1992, n tot: 3458

Tfs\_to\_targets\_spearmanr.csv  
AUC: 0.9590309633027523, AP: 0.9797966207211075  
n corr: 2264, n tot: 3458

Tfs\_to\_targets\_100.csv  
AUC: 0.675046878874287, AP: 0.8089876718633584  
n corr: 1975, n tot: 3458

Tfs\_to\_targets\_1000\_1000\_1000.csv  
AUC: 0.6719501611703447, AP: 0.8103590442160198  
n corr: 1984, n tot: 3458

Tfs\_to\_targets\_500\_500\_500.csv  
AUC: 0.6494599243739152, AP: 0.7954856257804359  
n corr: 1952, n tot: 3458

Tfs\_to\_targets\_50.csv  
AUC: 0.6797545251673691, AP: 0.8098362162795755  
n corr: 1996, n tot: 3458

Tfs\_to\_targets\_no\_hidden\_.csv  
AUC: 0.6451832925241755, AP: 0.7953751419763172  
n corr: 1733, n tot: 3458

Tfs\_to\_targets\_50\_50\_50.csv  
AUC: 0.6647959025539301, AP: 0.8008448329704512  
n corr: 1921, n tot: 3458

Tfs\_to\_targets\_50\_50.csv  
AUC: 0.6770405870319861, AP: 0.8034297243066475  
n corr: 1998, n tot: 3458

Tfs\_to\_targets\_500\_500.csv  
AUC: 0.6431549094966527, AP: 0.792028706538777  
n corr: 1965, n tot: 3458

Tfs\_to\_targets\_250\_250.csv  
AUC: 0.70053077733697, AP: 0.8284202773227727  
n corr: 2013, n tot: 3458

Tfs\_to\_targets\_1000\_1000.csv  
AUC: 0.664138823456484, AP: 0.802734455107331  
n corr: 1944, n tot: 3458

Tfs\_to\_targets\_500.csv  
AUC: 0.6648799745846765, AP: 0.8044161147570315  
n corr: 1974, n tot: 3458

Tfs\_to\_targets\_100\_100.csv

AUC: 0.6615469253657327, AP: 0.8004666784457402

n corr: 1940, n tot: 3458

TFs\_to\_targets\_no\_hidden\_ROC, TRRUST

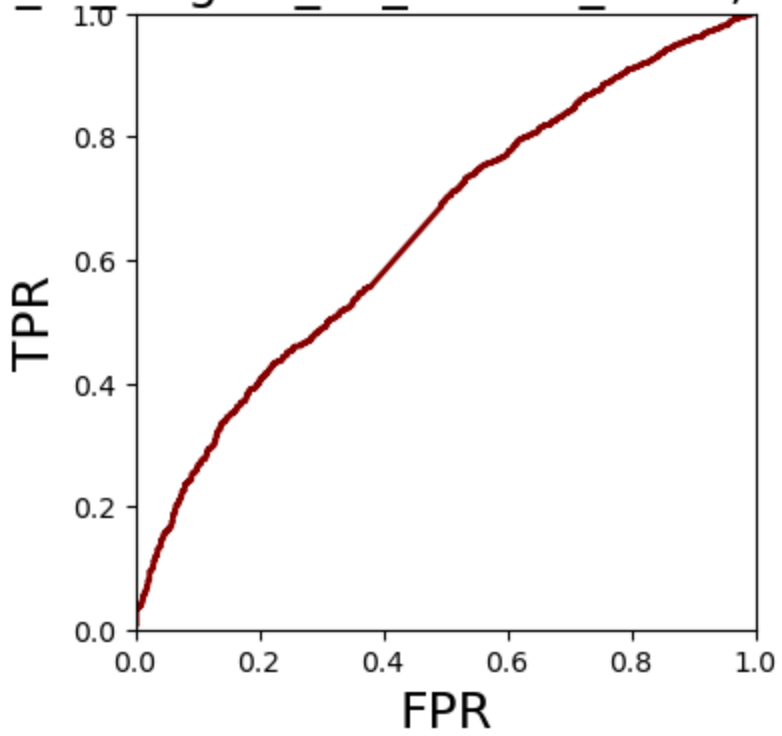

TFs\_to\_targets\_no\_hidden\_ROC, DoRothEA

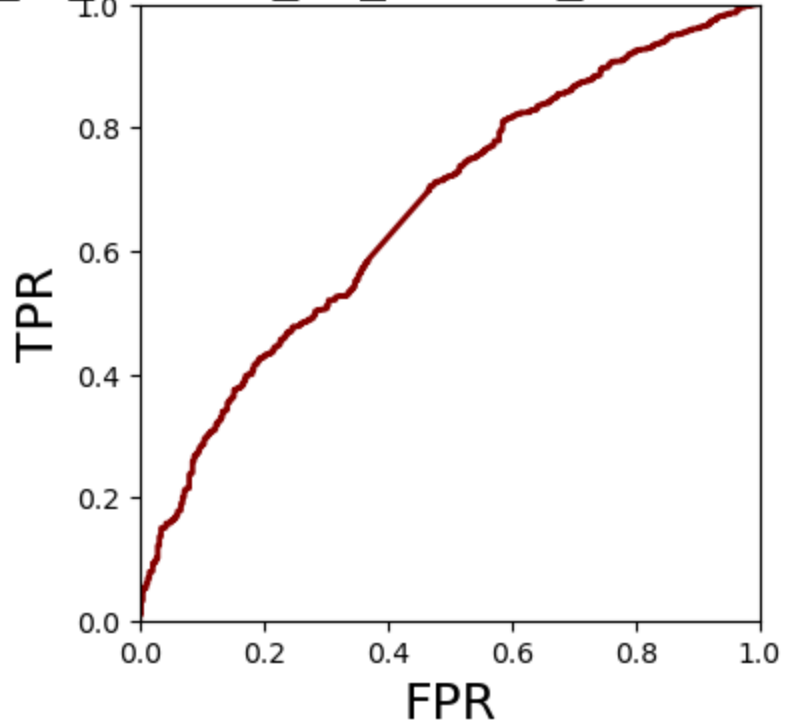



# TFs to\_targets\_1000 ROC, TRRUST

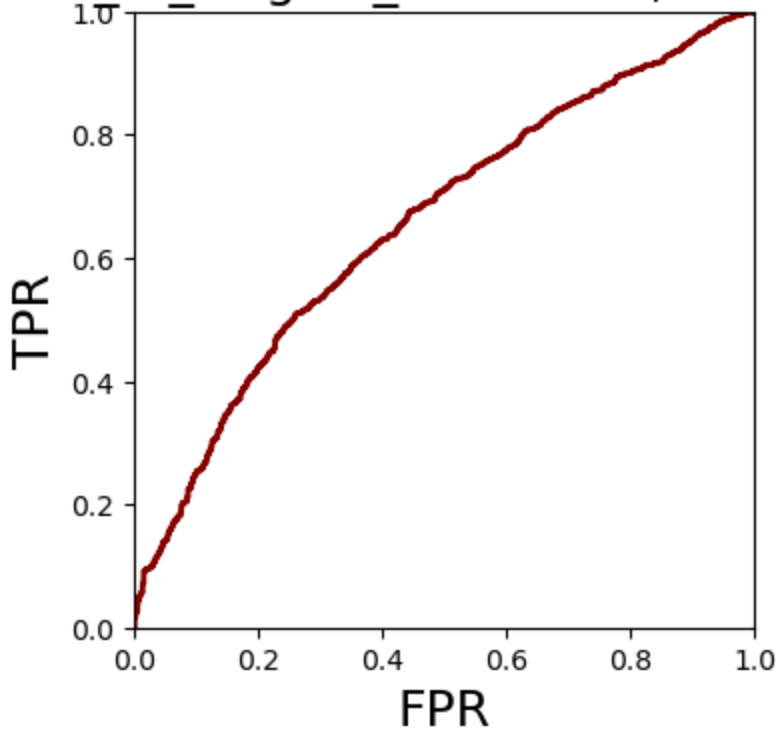

TFs\_to\_targets\_1000 ROC, DoRoThEA

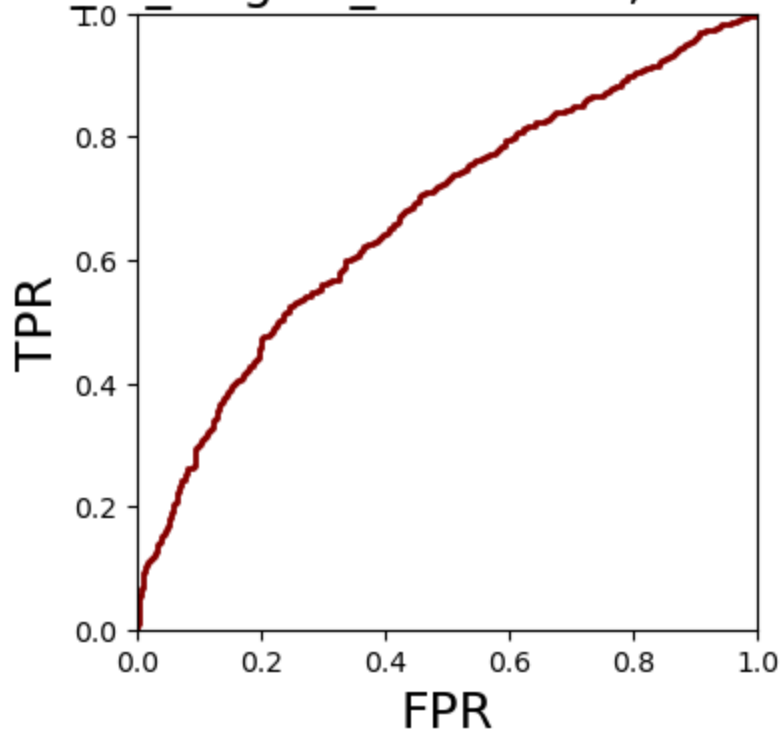

TFs\_to\_targets\_1000\_1000 ROC, TRRUST

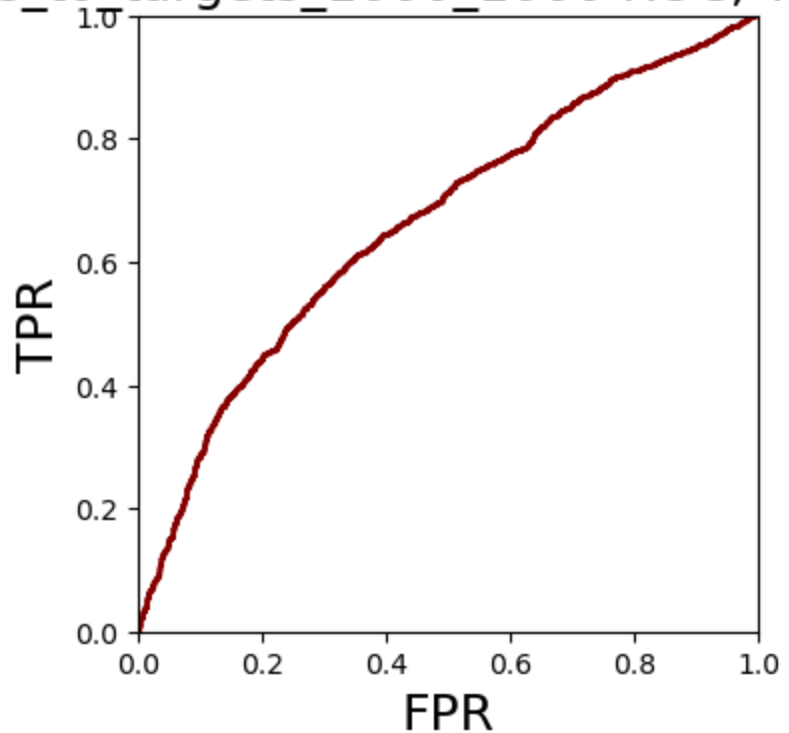

TFs\_to\_targets\_1000\_1000 ROC, DoRothEA

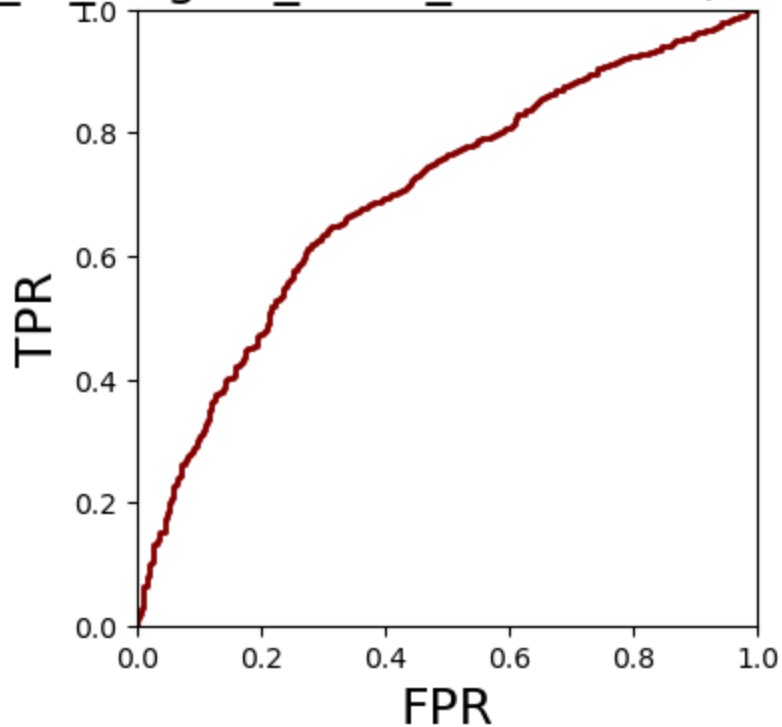

TFs\_to\_targets\_1000\_1000\_1000 ROC, TRRUST

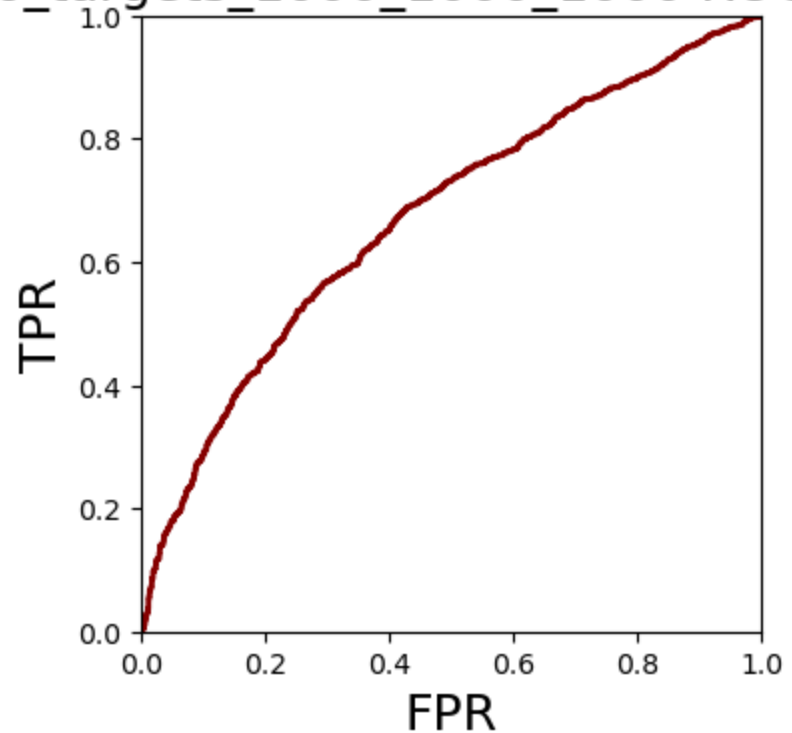

TFs\_to\_targets\_1000\_1000\_1000 ROC, DoRothEA

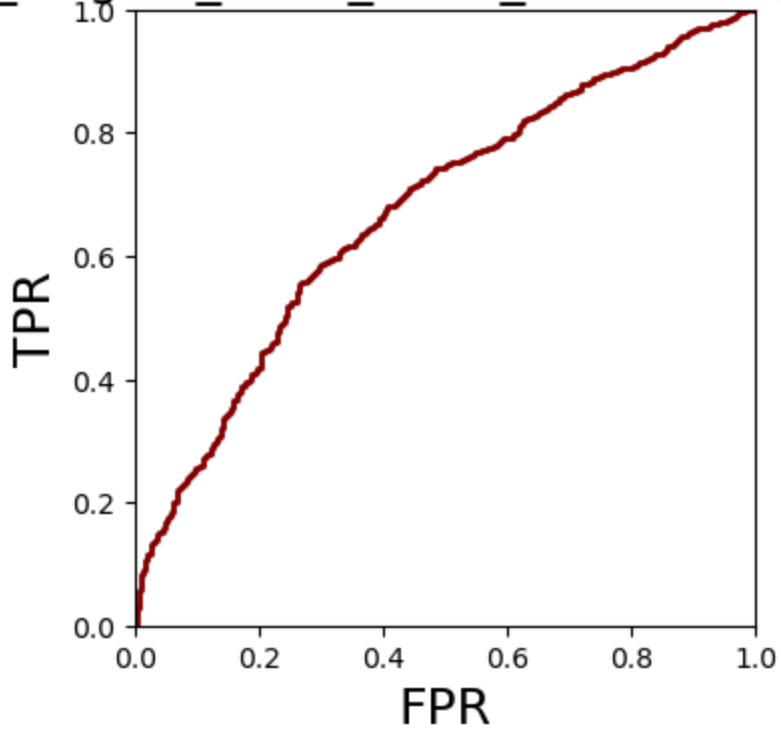

TFs\_to\_targets\_500 ROC, TRRUST

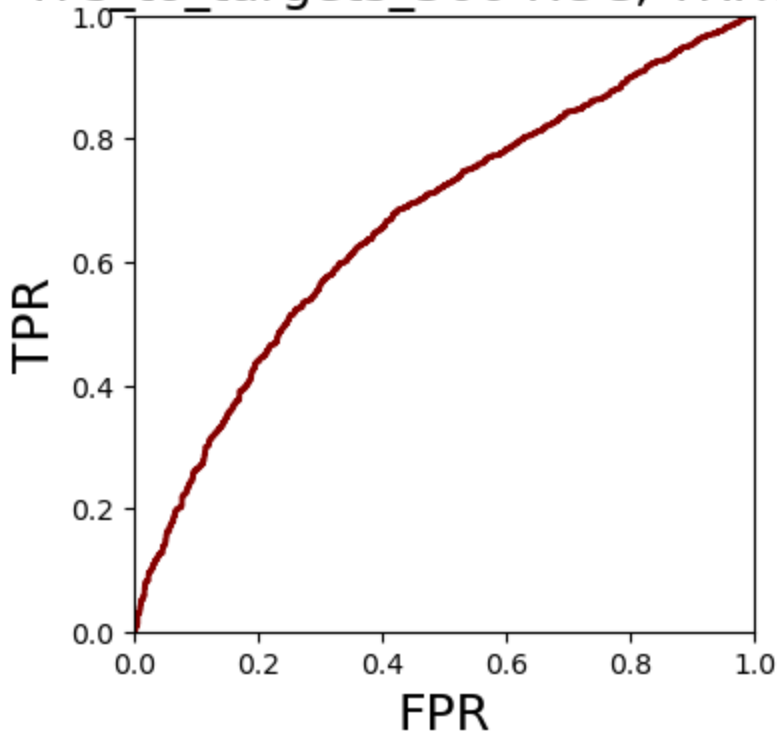

TFs to\_targets\_500 ROC, DoRoThEA

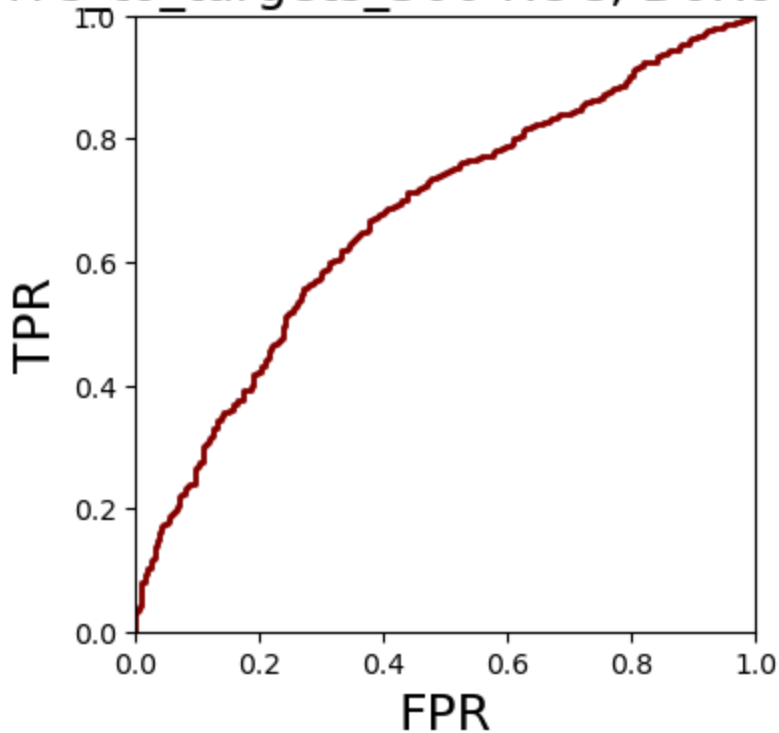



TFs\_to\_targets\_500\_500 ROC, TRRUST

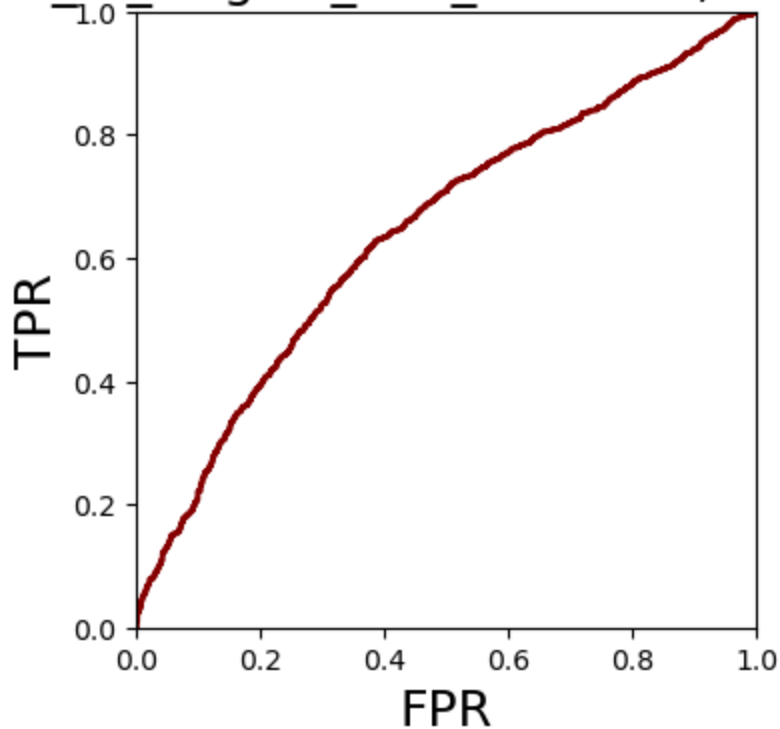

TFs\_to\_targets\_500\_500 ROC, DoRothEA

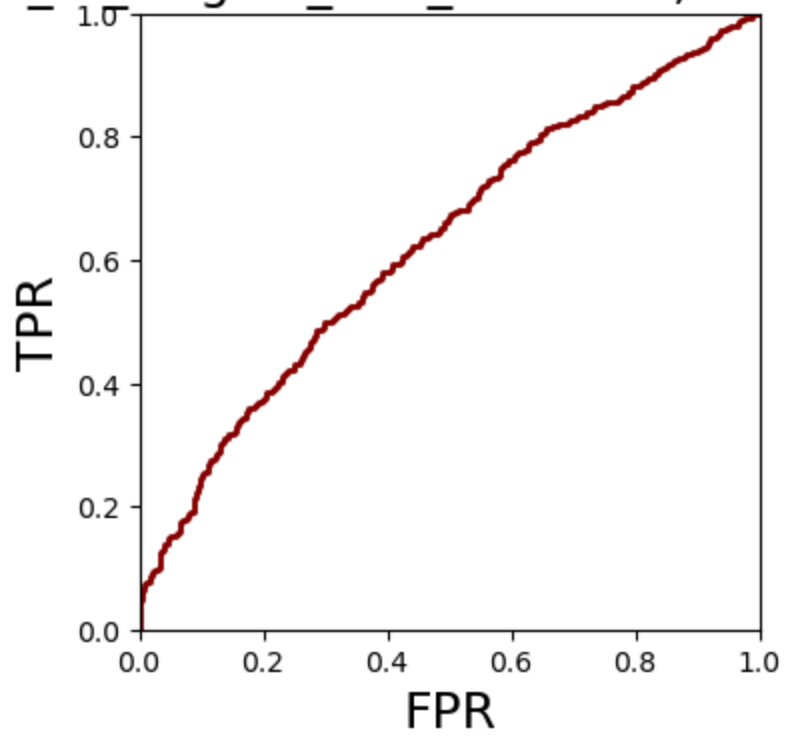

TFs\_to\_targets\_500\_500\_500 ROC, TRRUST

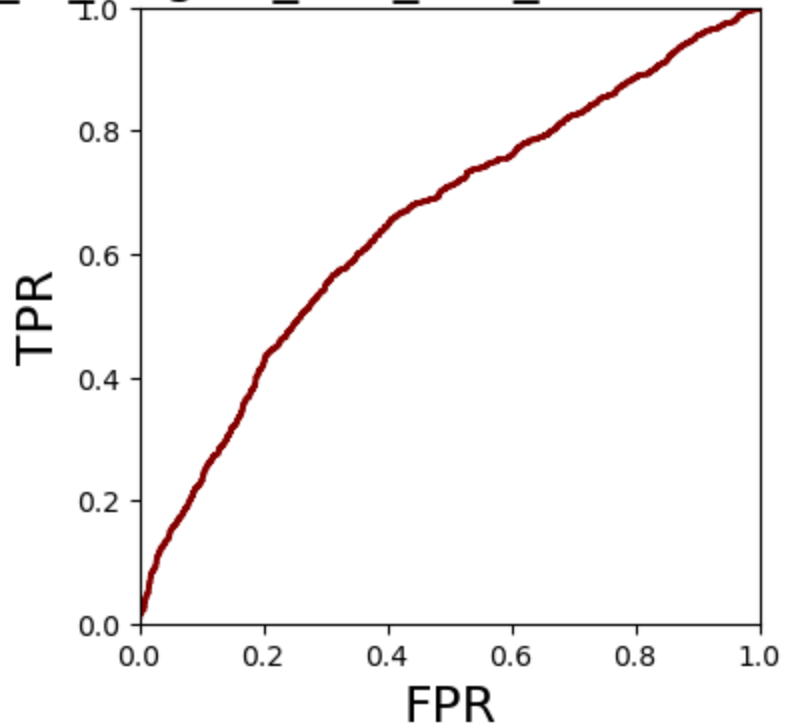

TFs\_to\_targets\_500\_500\_500 ROC, DoRothEA

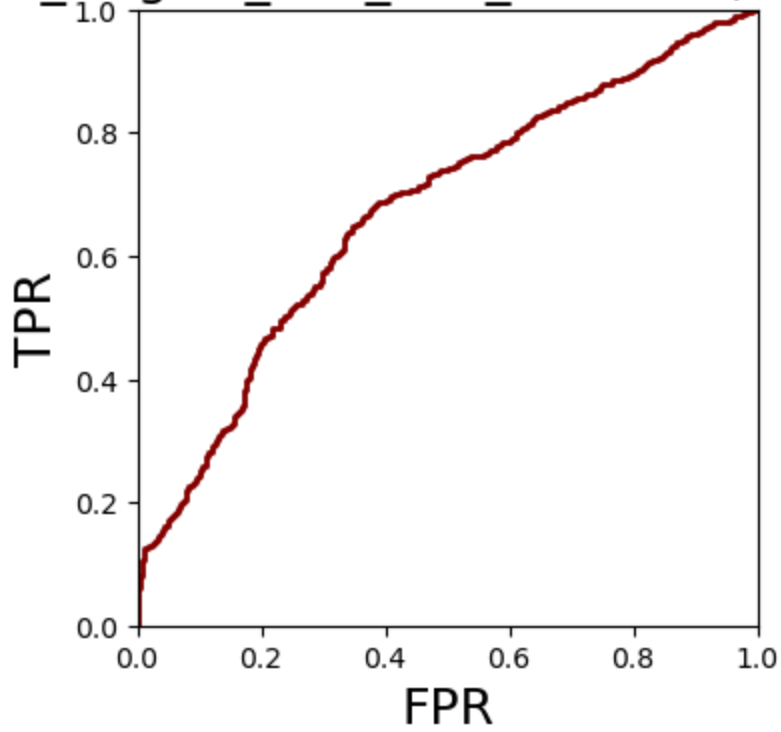

TFs\_to\_targets\_250 ROC, TRRUST

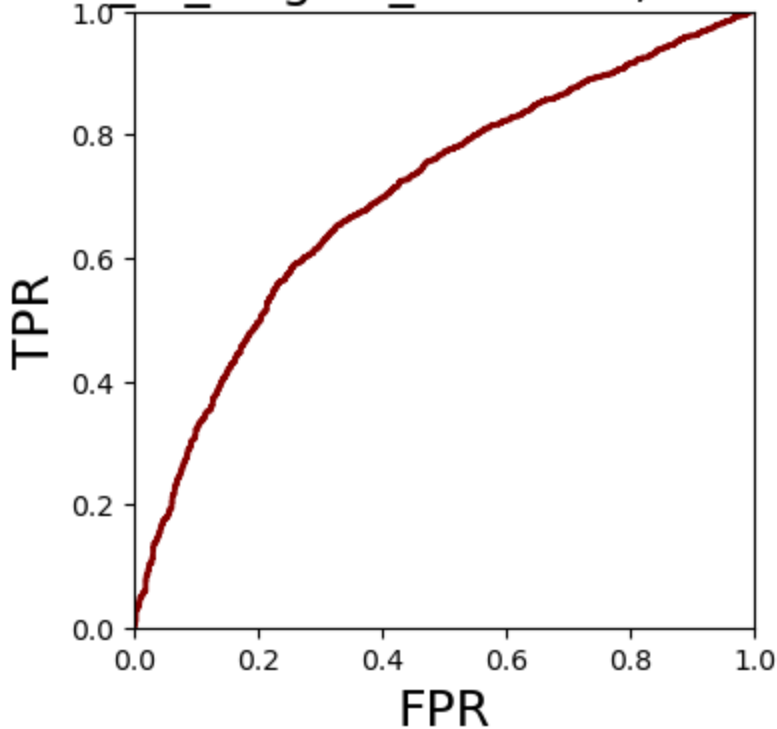

TFs to\_targets\_250 ROC, DoRoThEA

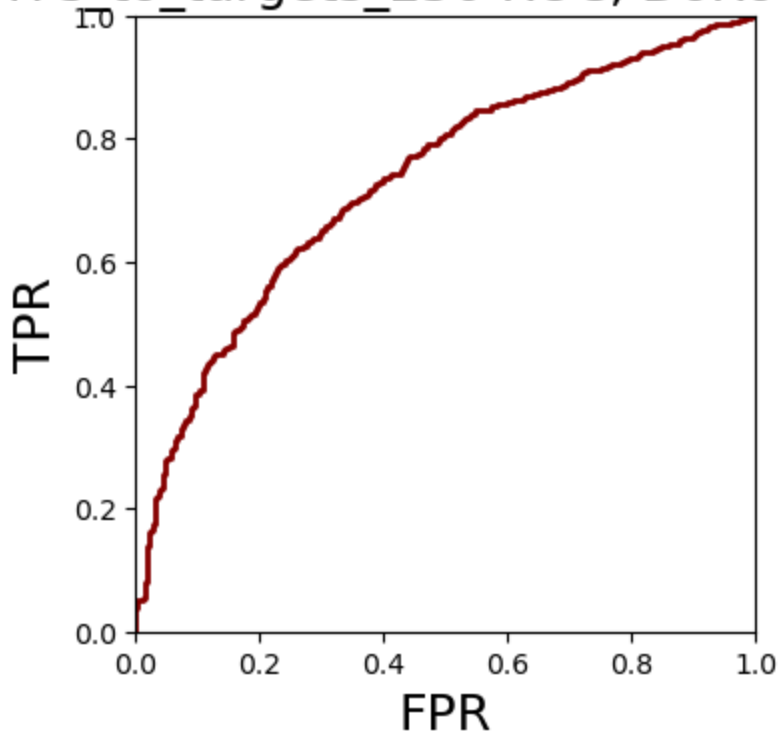

TFs\_to\_targets\_250\_250 ROC, TRRUST

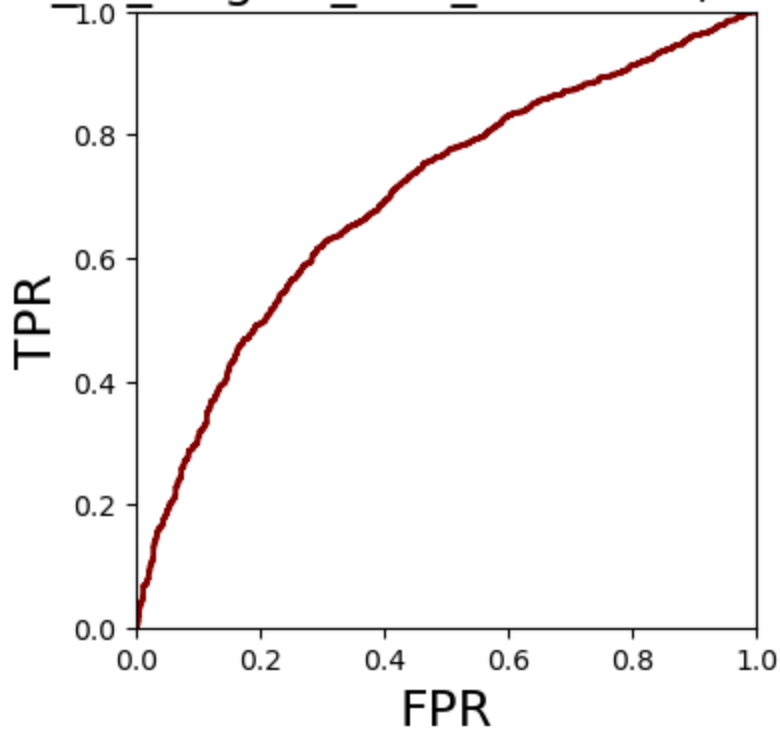

TFs\_to\_targets\_250\_250 ROC, DoRothEA

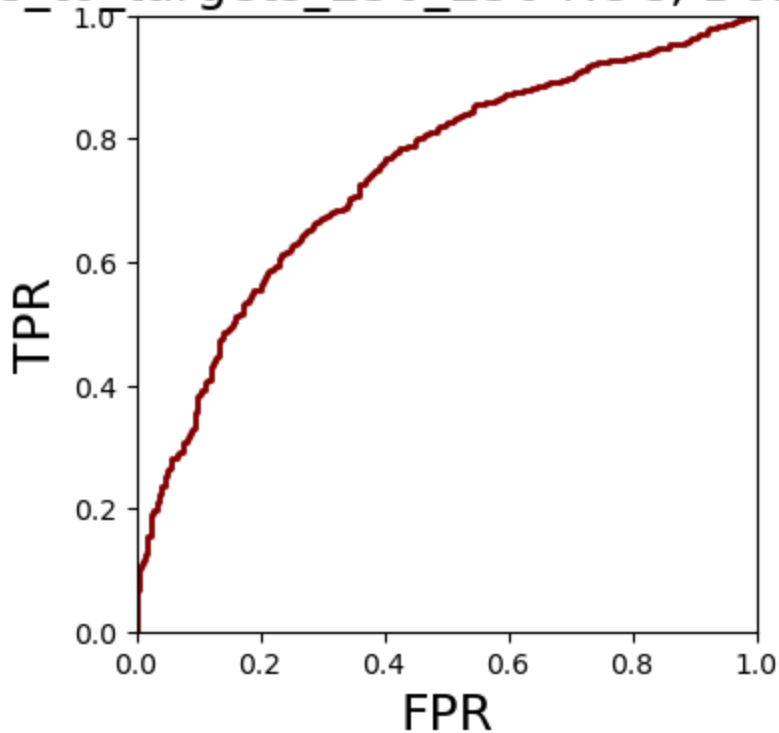



TFs\_to\_targets\_250\_250\_250 ROC, TRRUST

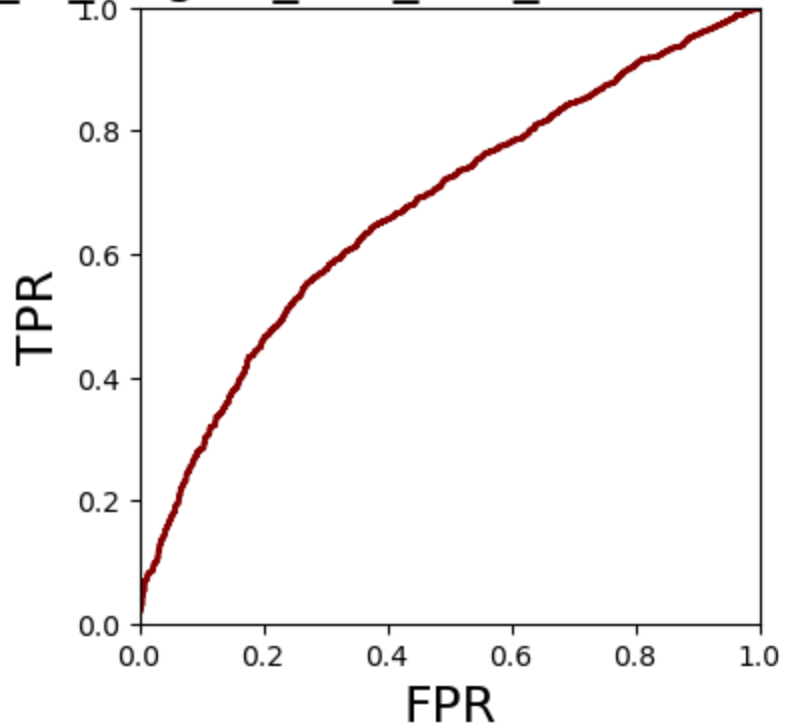

TFs\_to\_targets\_250\_250\_250 ROC, DoRothEA

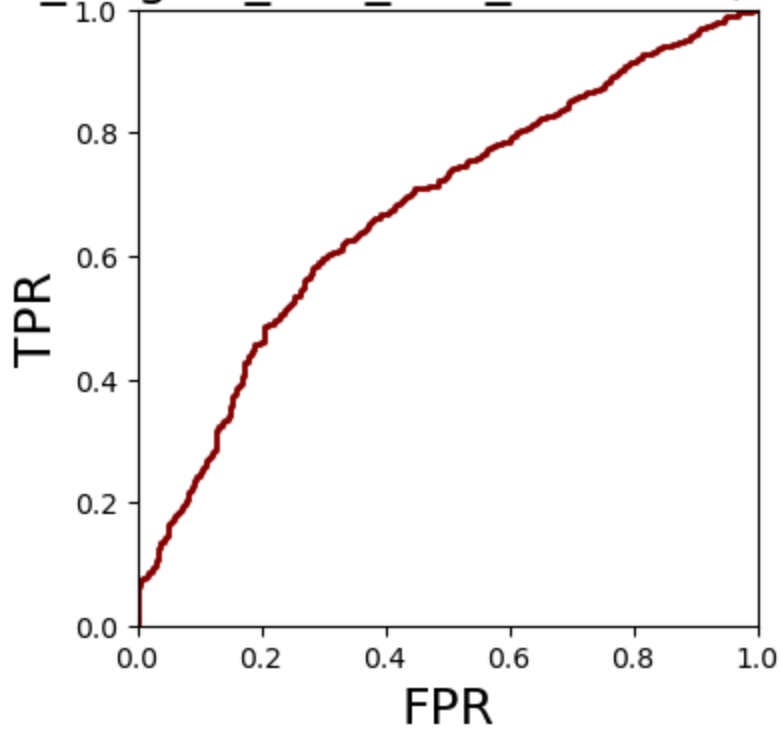

TFs\_to\_targets\_100 ROC, TRRUST

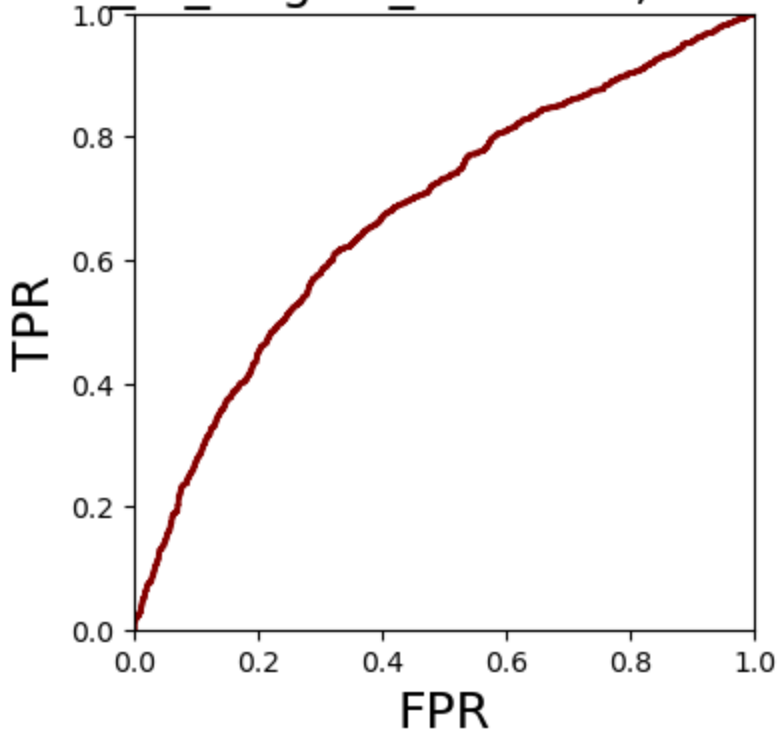

TFs\_to\_targets\_no\_hidden\_ROC, TRRUST



TFs\_to\_targets\_no\_hidden\_ROC, DoRothEA



# TFs to\_targets\_1000 ROC, TRRUST

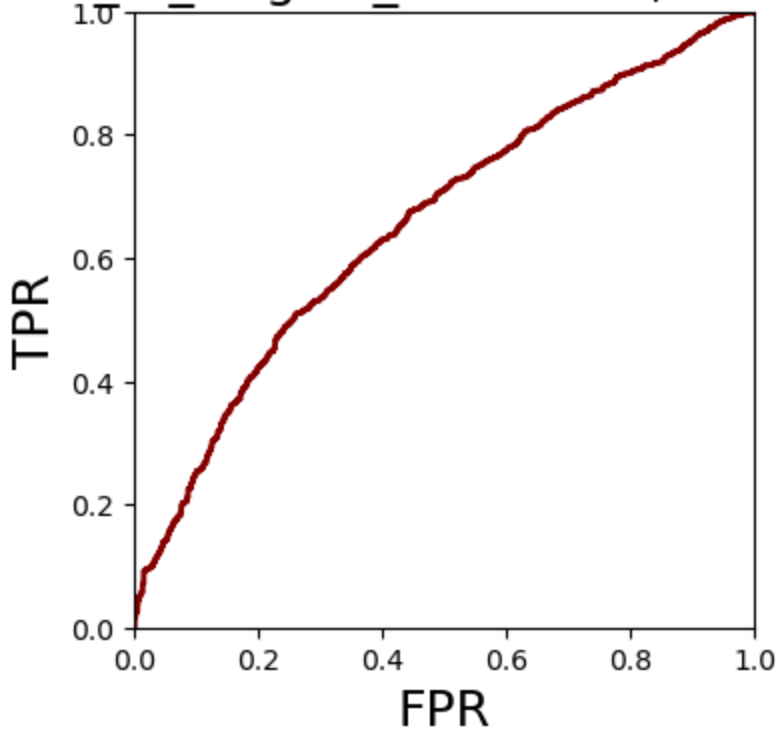

TFs\_to\_targets\_1000 ROC, DoRoThEA



TFs\_to\_targets\_1000\_1000 ROC, TRRUST





TFs\_to\_targets\_1000\_1000 ROC, DoRothEA

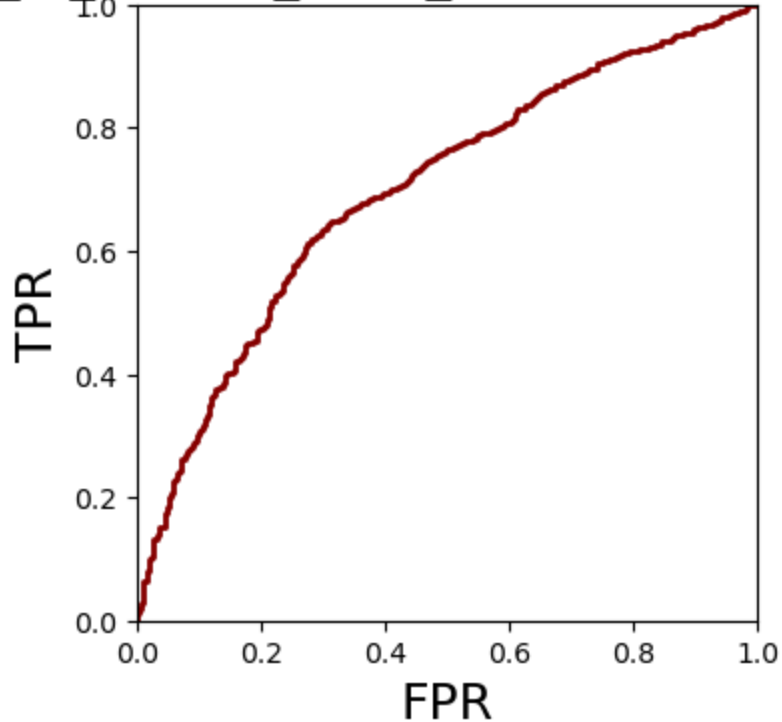

TFs\_to\_targets\_1000\_1000\_1000 ROC, TRRUST



TFs\_to\_targets\_1000\_1000\_1000 ROC, DoRothEA



TFs\_to\_targets\_500 ROC, TRRUST

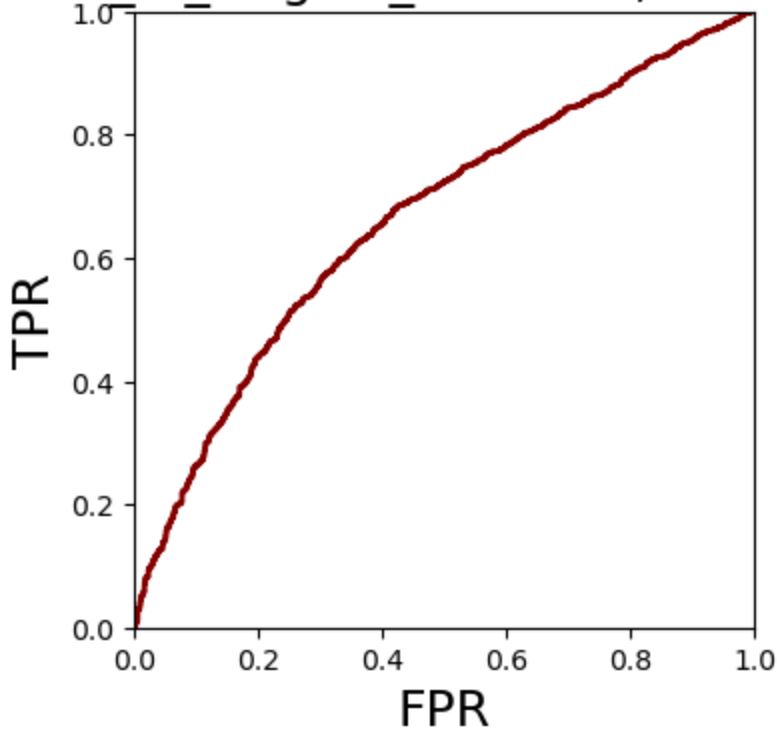

TFs to\_targets\_500 ROC, DoRoThEA



TFs\_to\_targets\_500\_500 ROC, TRRUST



TFs\_to\_targets\_500\_500 ROC, DoRothEA

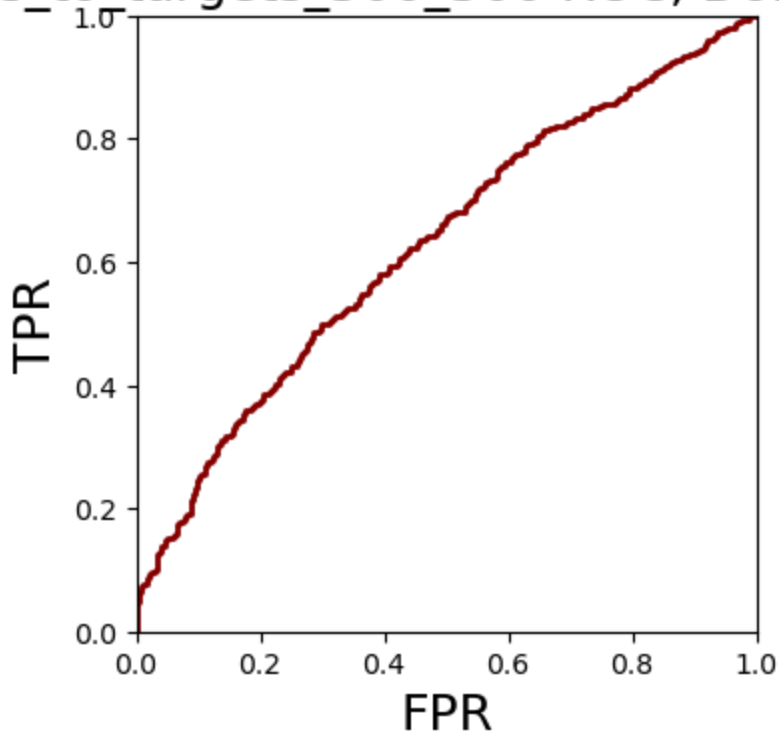

TFs\_to\_targets\_500\_500\_500 ROC, TRRUST





TFs\_to\_targets\_500\_500\_500 ROC, DoRothEA



TFs\_to\_targets\_250 ROC, TRRUST



TFs to\_targets\_250 ROC, DoRothEA



TFs\_to\_targets\_250\_250 ROC, TRRUST



TFs\_to\_targets\_250\_250 ROC, DoRothEA

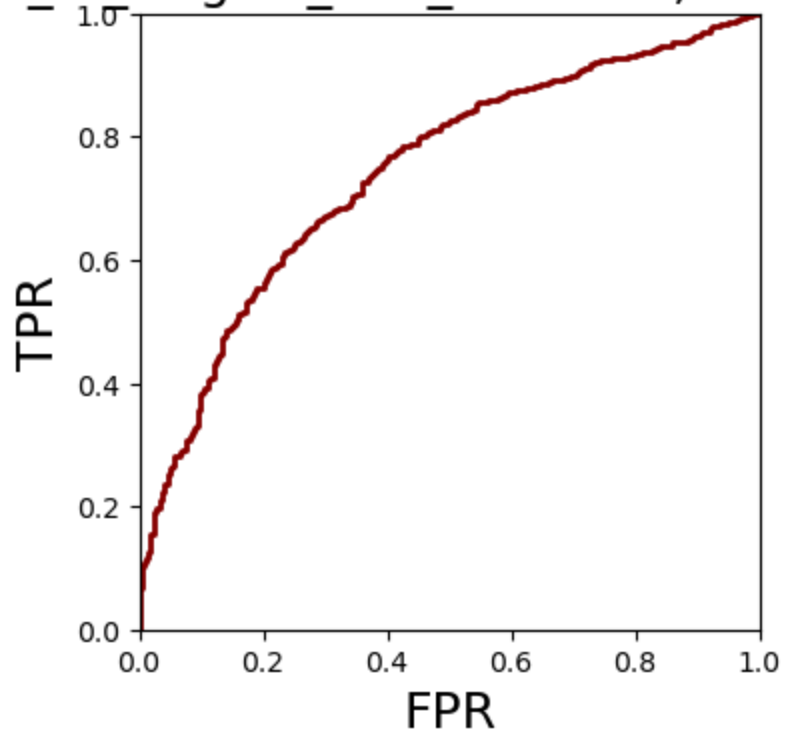

TFs\_to\_targets\_250\_250\_250 ROC, TRRUST



TFs\_to\_targets\_250\_250\_250 ROC, DoRothEA



TFs\_to\_targets\_100 ROC, TRRUST





TFs to\_targets\_100 ROC, DoRoThEA

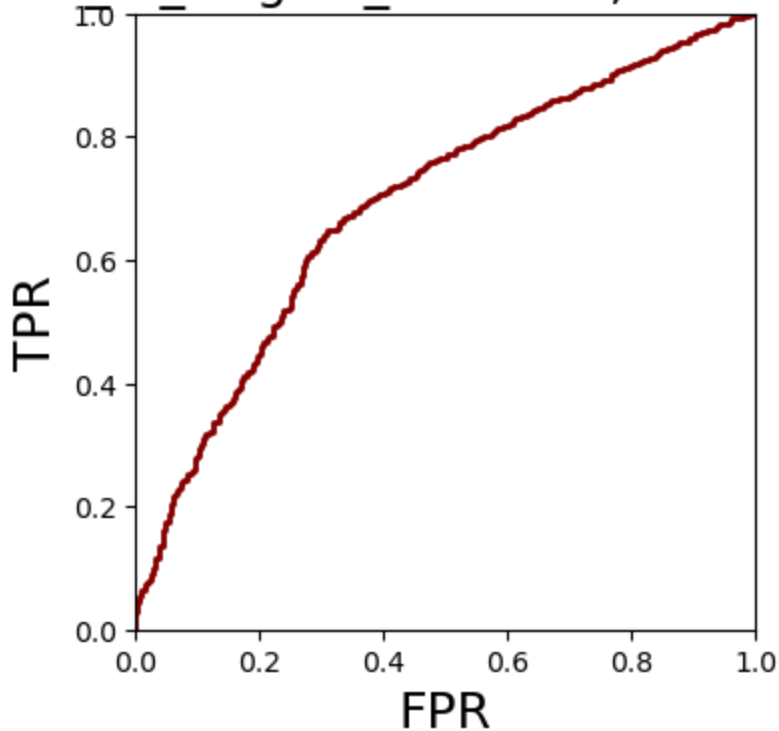

TFs\_to\_targets\_100\_100 ROC, TRRUST

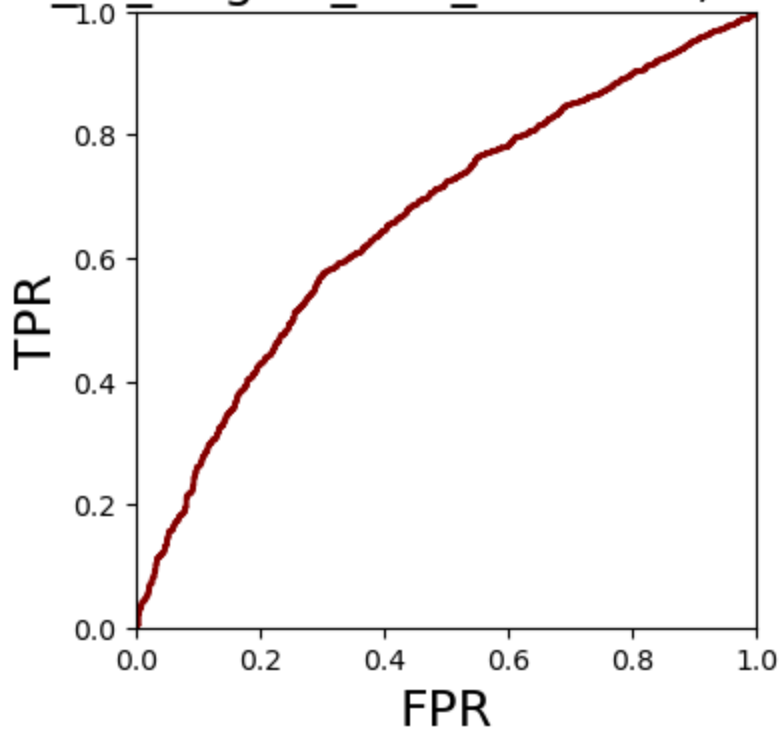

TFs\_to\_targets\_100\_100 ROC, DoRothEA

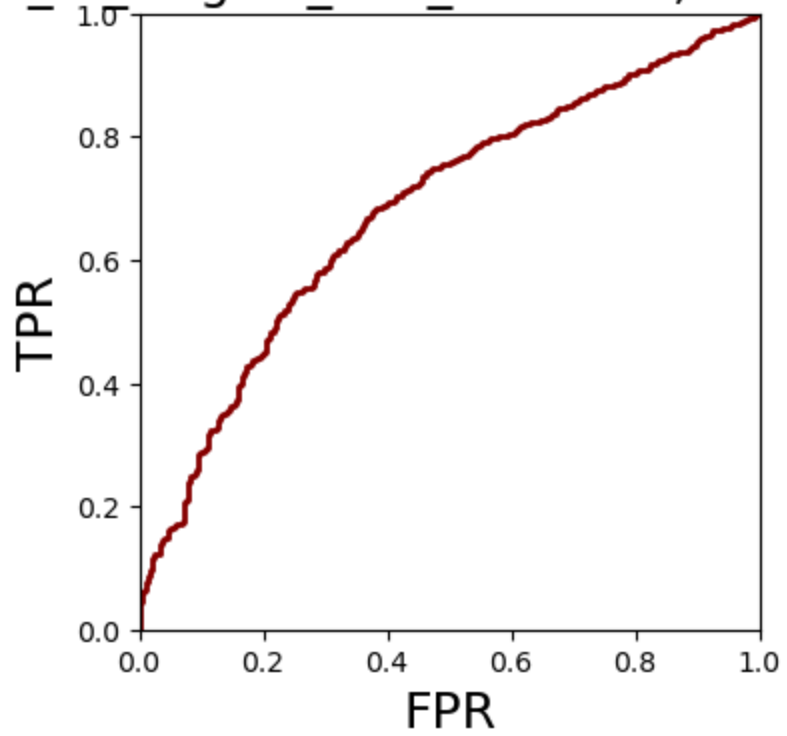

TFs\_to\_targets\_100\_100\_100 ROC, TRRUST

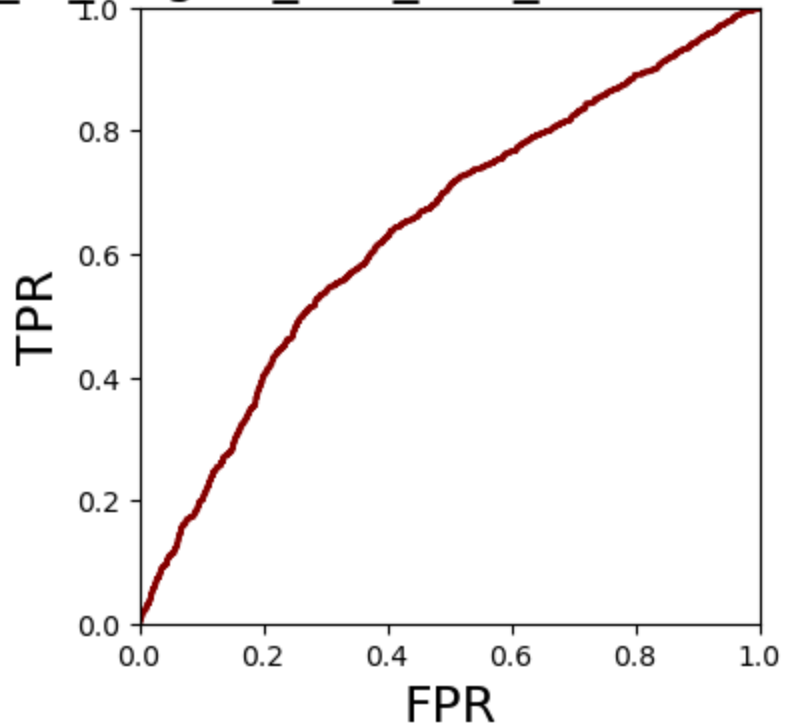

TFs\_to\_targets\_100\_100\_100 ROC, DoRothEA

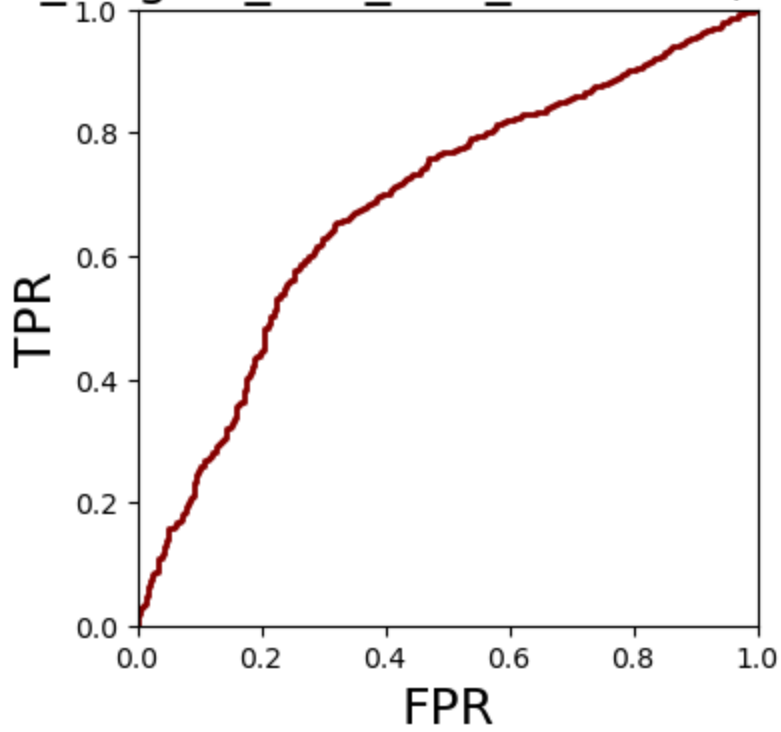

TFs\_to\_targets\_50 ROC, TRRUST

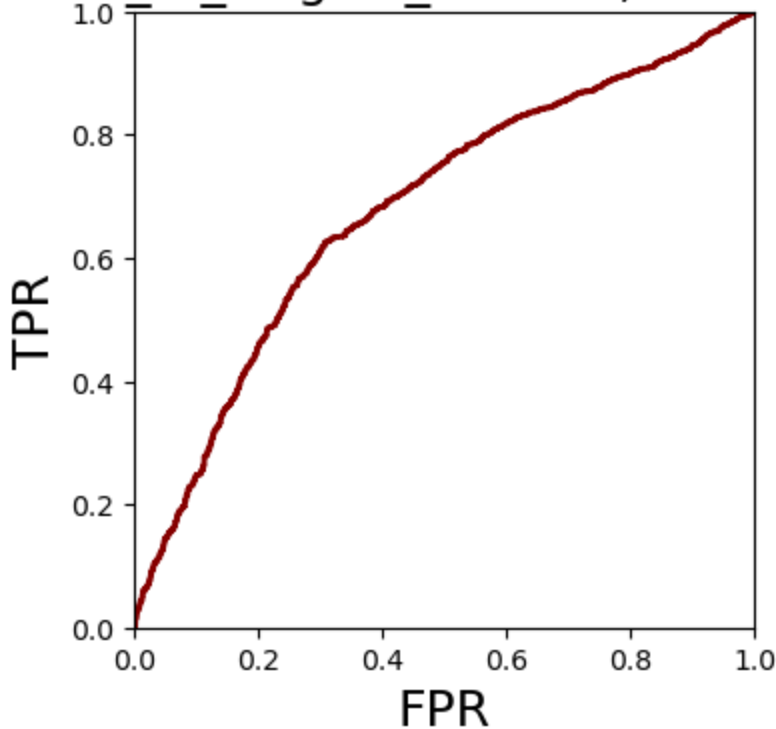

TFs to\_targets\_50 ROC, DoRoThEA

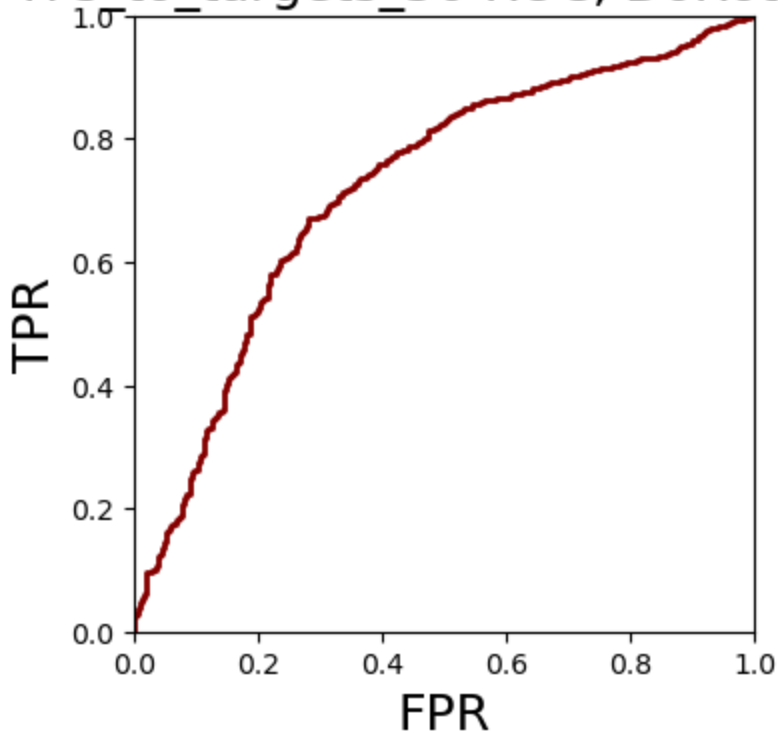

TFs to\_targets\_50\_50 ROC, TRRUST

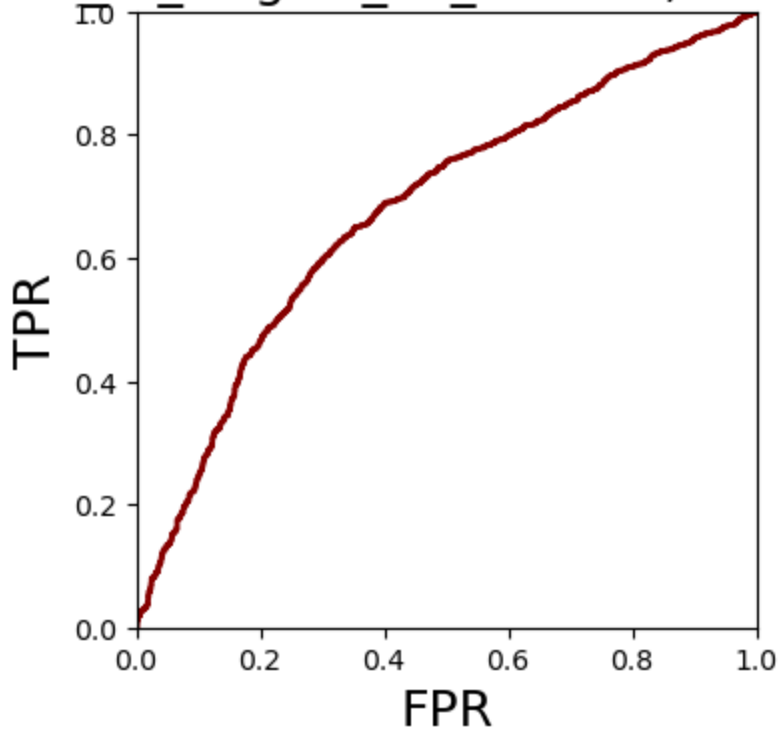



TFs\_to\_targets\_50\_50 ROC, DoRoThEA

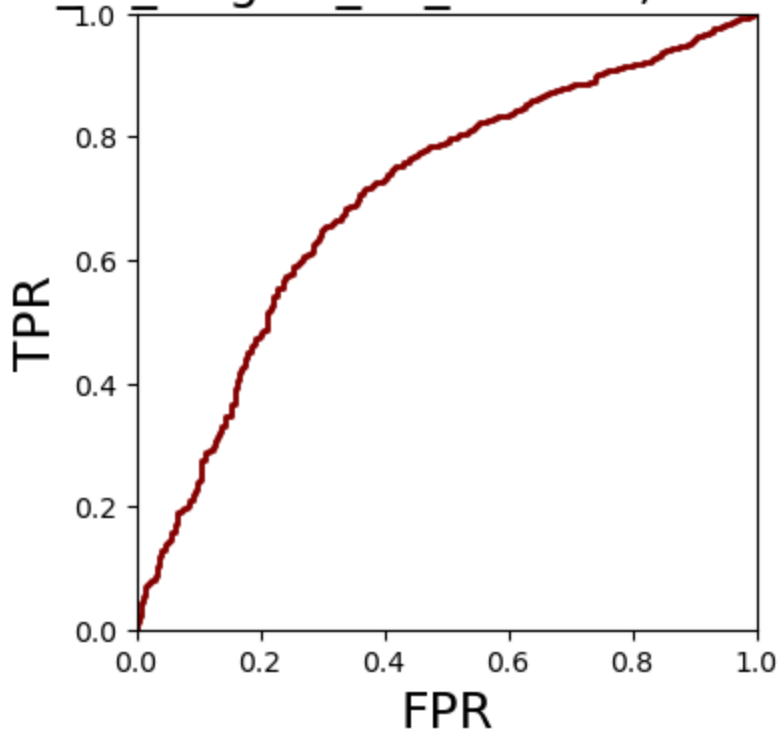

TFs\_to\_targets\_50\_50\_50 ROC, TRRUST

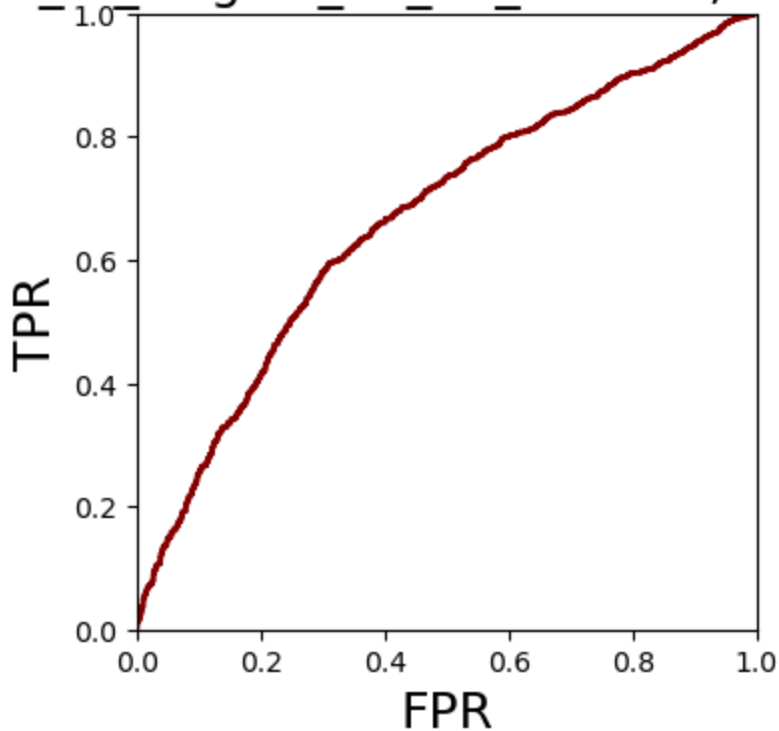

TFs\_to targets\_50\_50\_50 ROC, DoRothEA

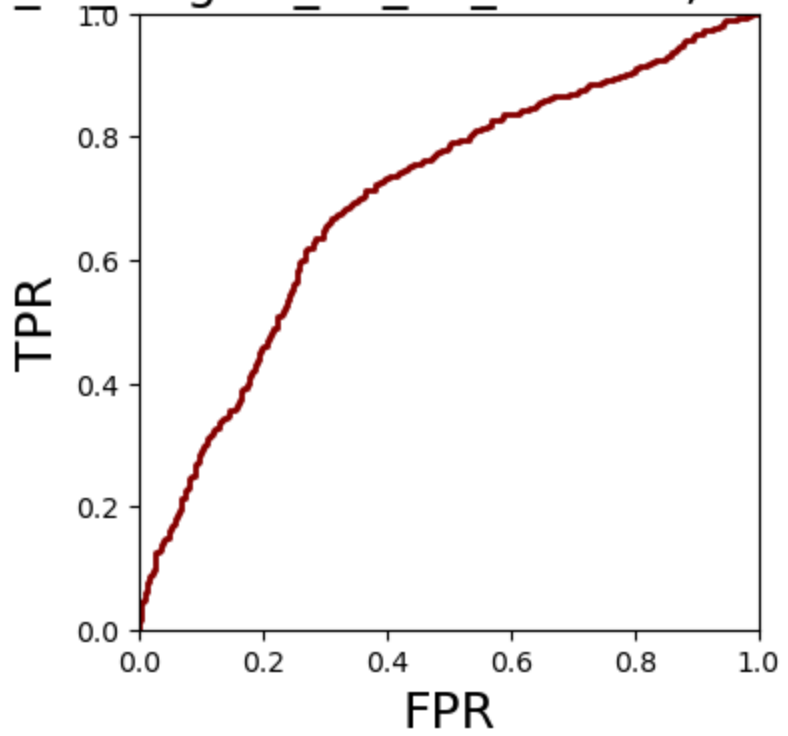

TFs\_to\_targets\_no\_hidden\_Precision Recall, TRRUST

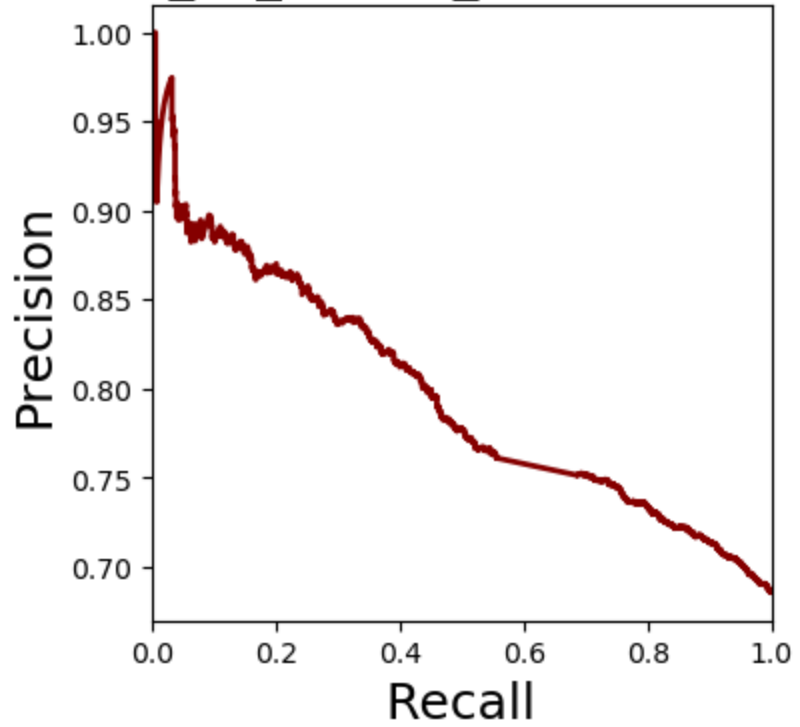

TFs\_to\_targets\_no\_hidden\_Precision Recall, DoRothEA

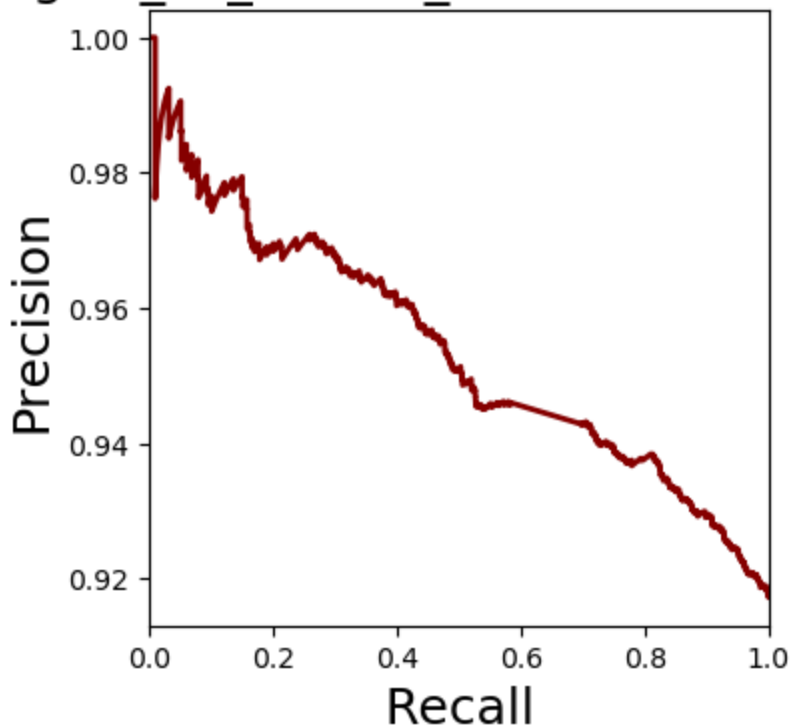

TFs\_to\_targets\_1000 Precision Recall, TRRUST

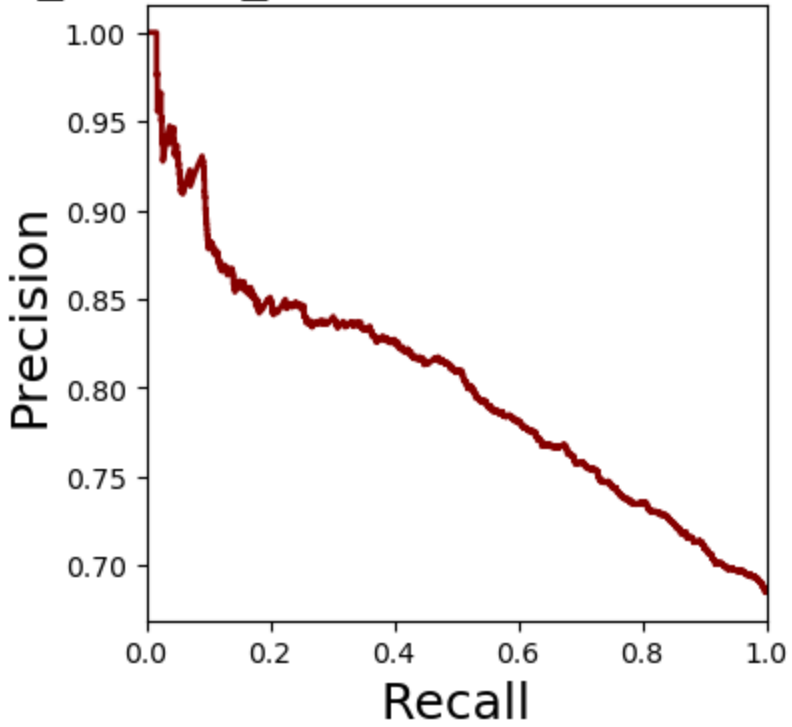

TFs\_to\_targets\_1000 Precision Recall, DoRothEA

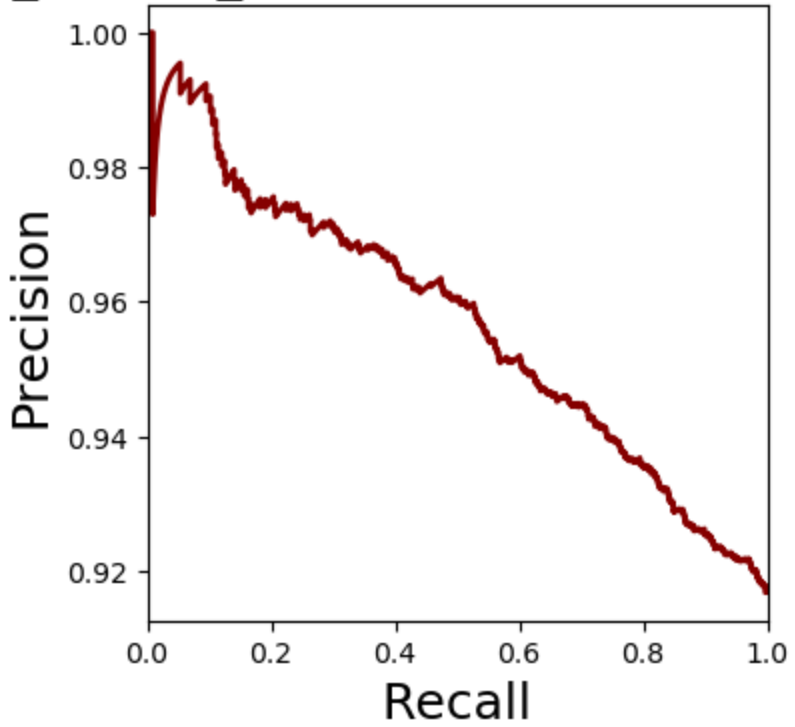

TFs\_to\_targets\_1000\_1000 Precision Recall, TRRUST

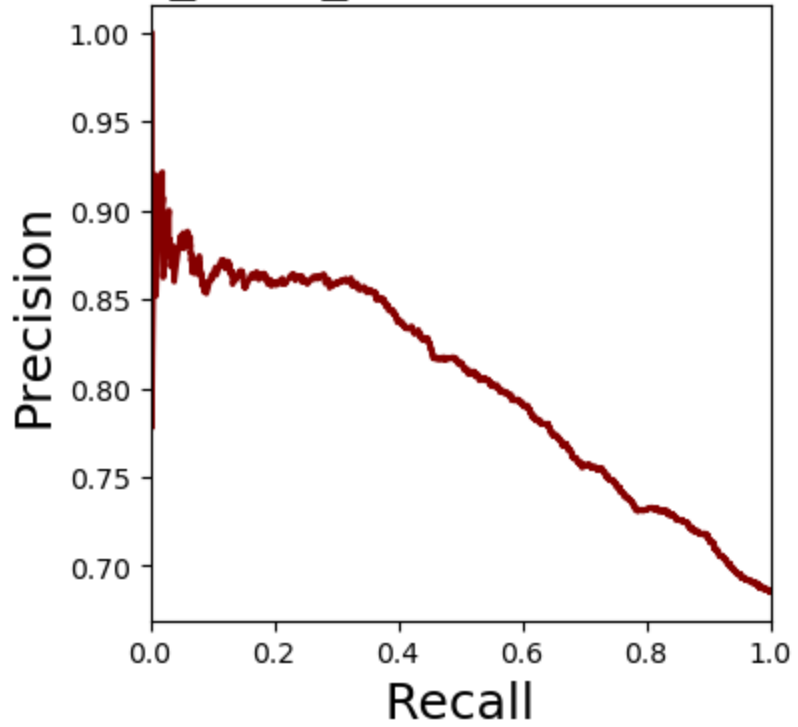



TFs\_to\_targets\_1000\_1000 Precision Recall, DoRothEA

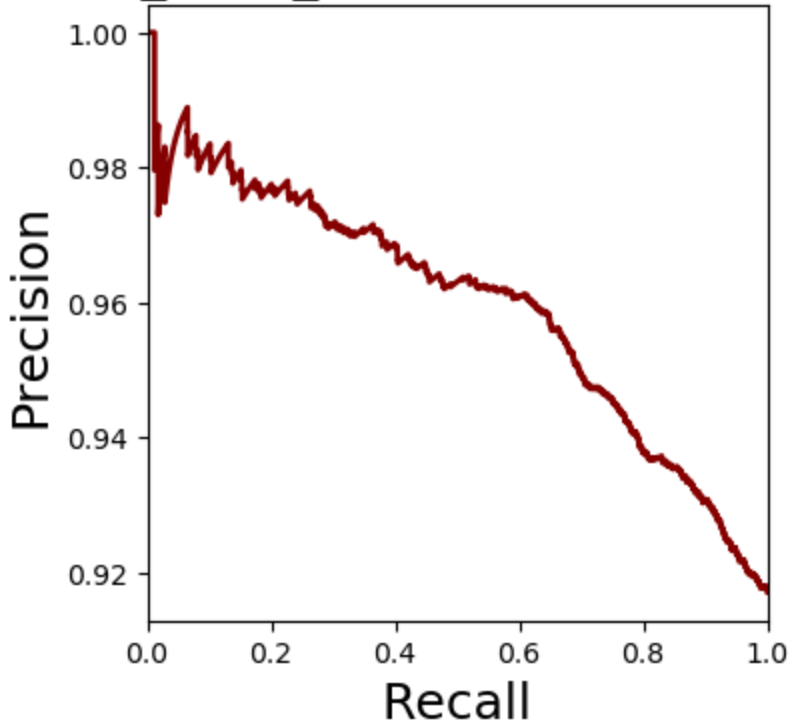

TFs\_to\_targets\_1000\_1000\_1000 Precision Recall, TRRUST

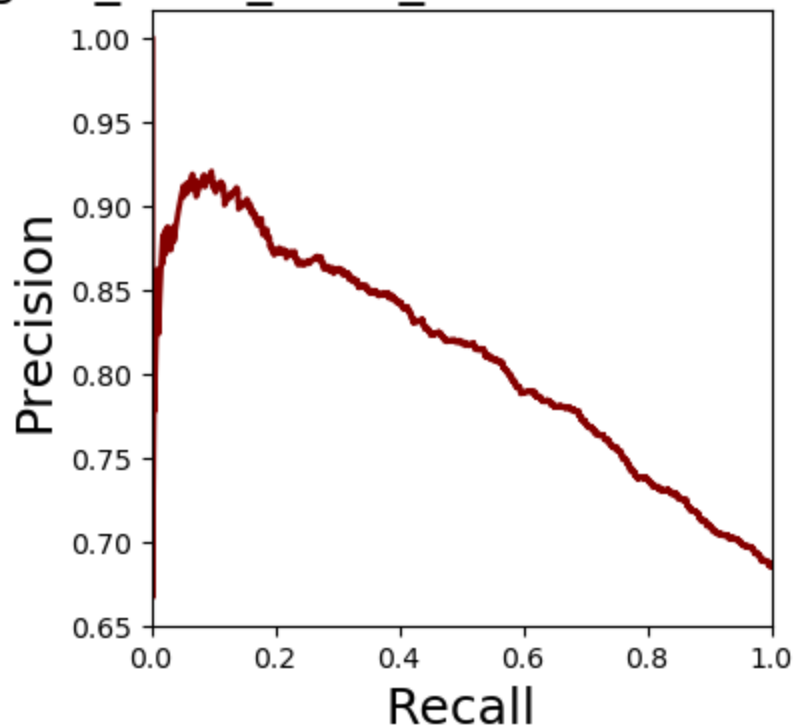

TFs\_to\_targets\_1000\_1000\_1000 Precision Recall, DoRothEA

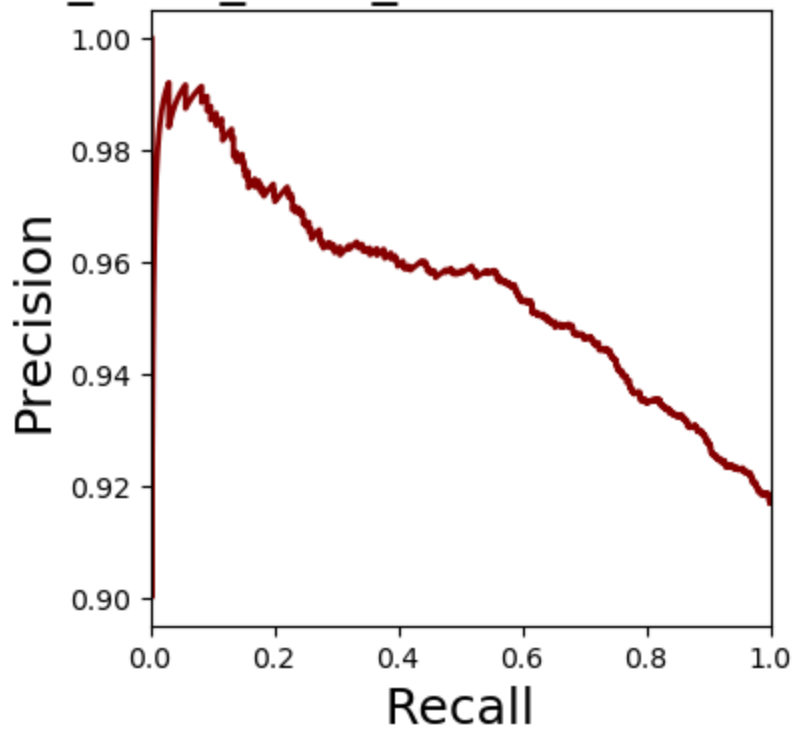

# TFs\_to\_targets\_500 Precision Recall, TRRUST

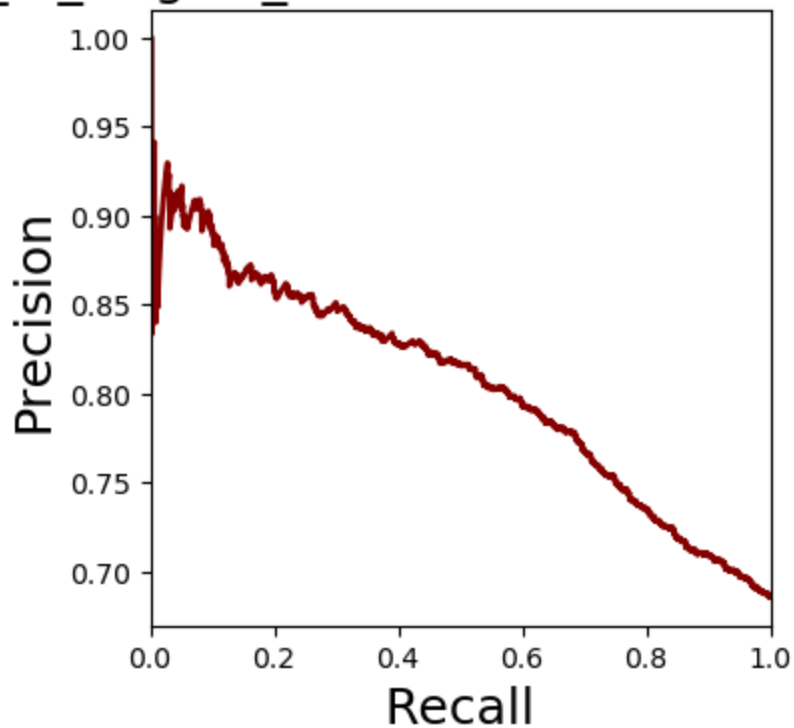

TFs\_to\_targets\_500 Precision Recall, DoRothEA

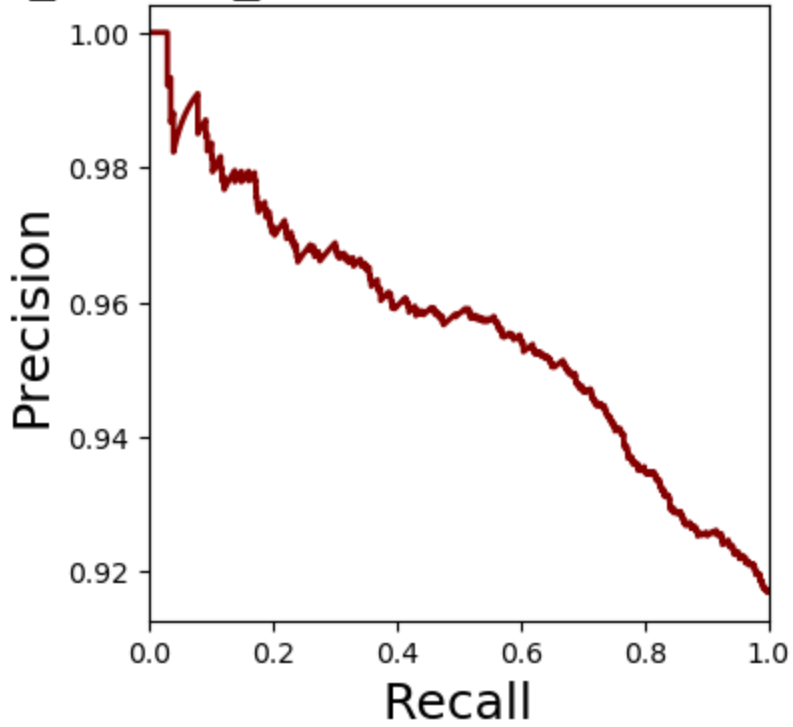

# TFs\_to\_targets\_500\_500 Precision Recall, TRRUST

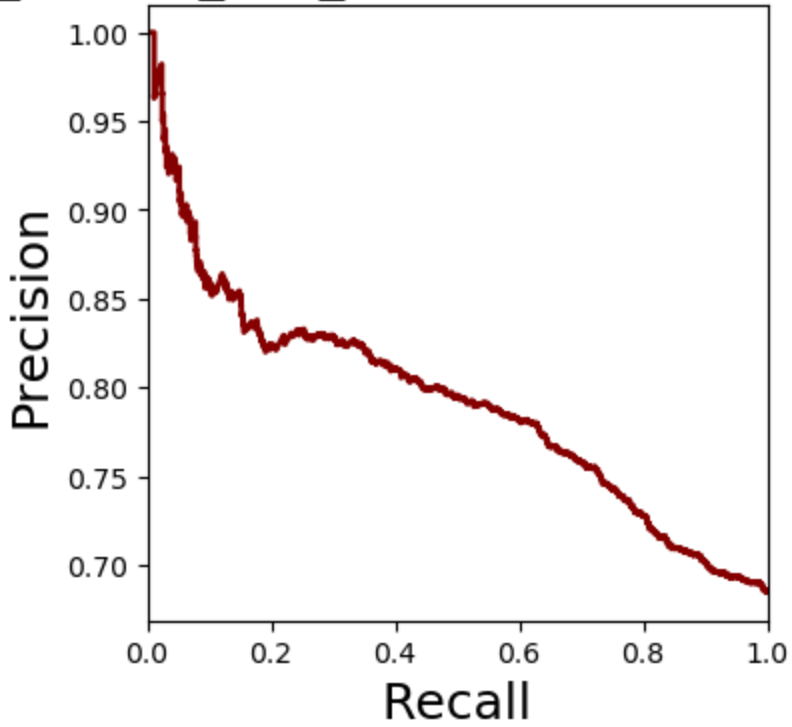

TFs\_to\_targets\_500\_500 Precision Recall, DoRothEA

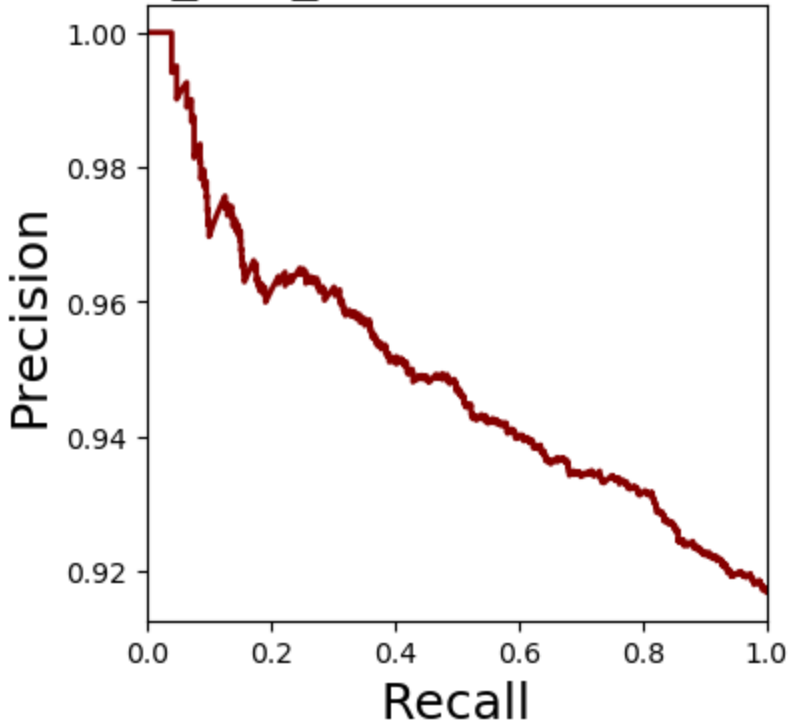

TFs\_to\_targets\_500\_500\_500 Precision Recall, TRRUST

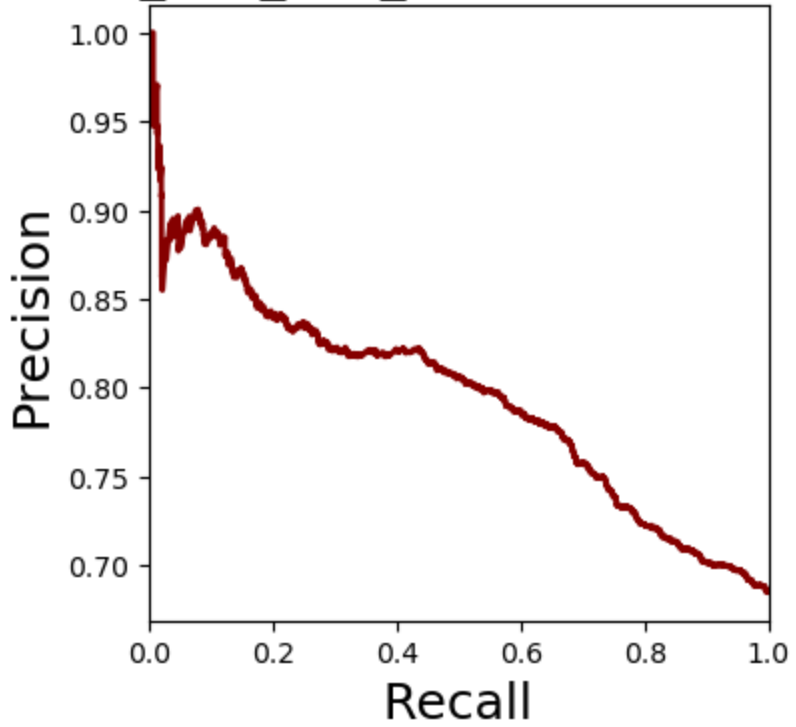



TFs\_to\_targets\_500\_500\_500 Precision Recall, DoRothEA

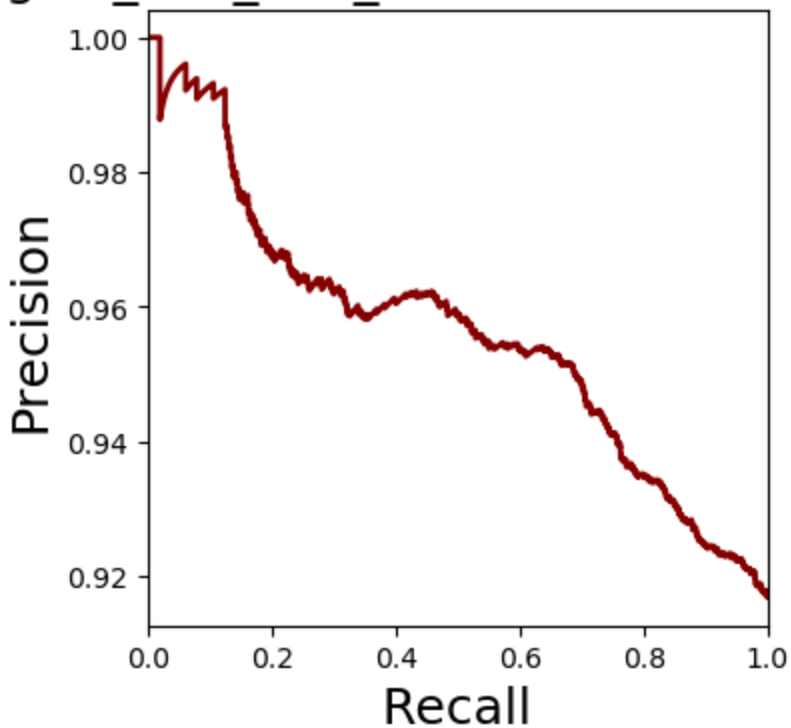

# TFs\_to\_targets\_250 Precision Recall, TRRUST

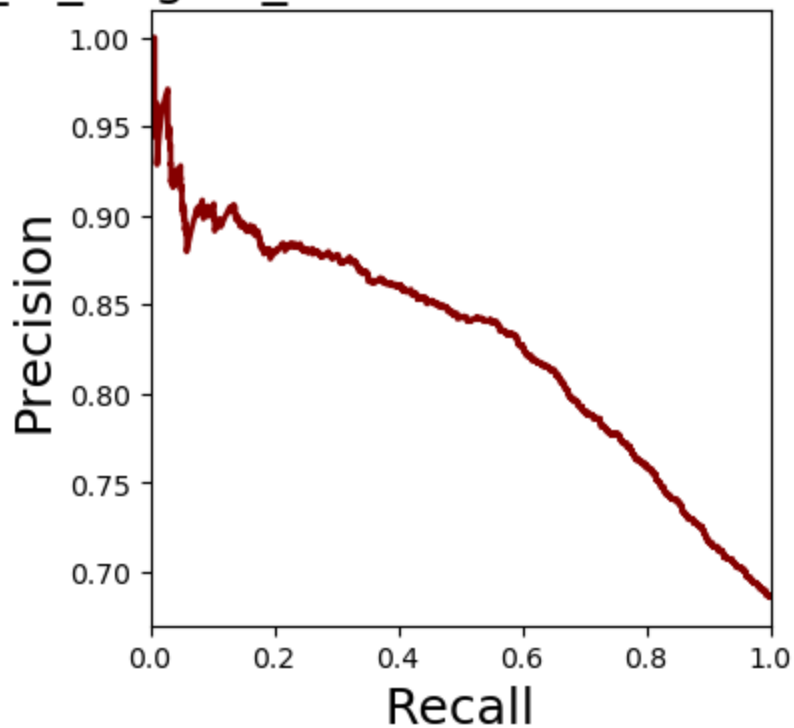

TFs\_to\_targets\_250 Precision Recall, DoRothEA

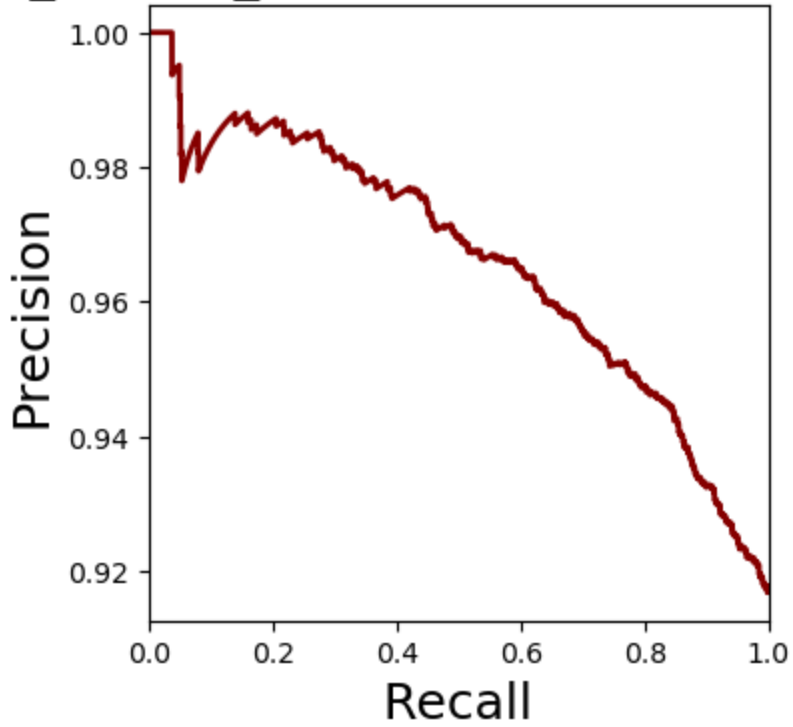

TFs\_to\_targets\_250\_250 Precision Recall, TRRUST

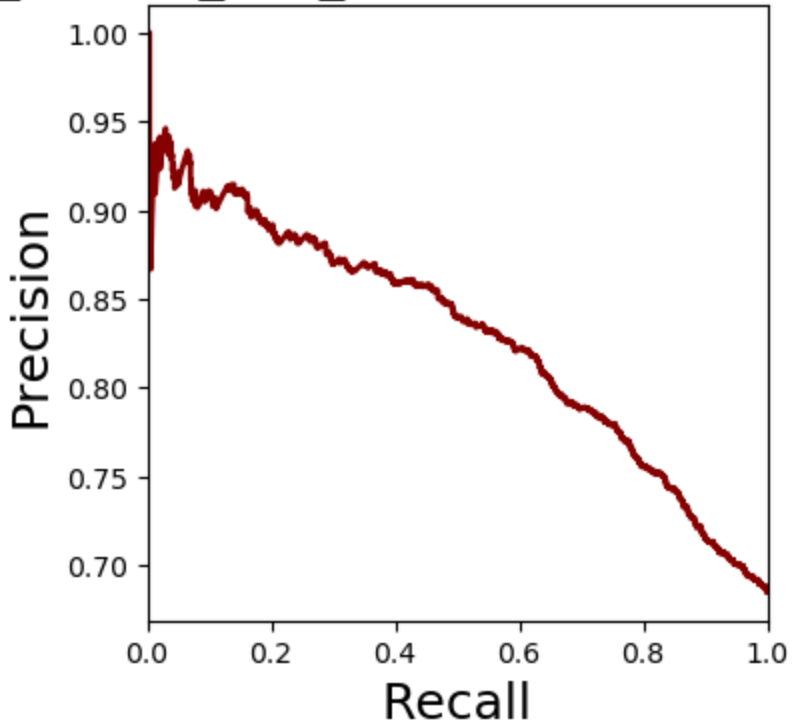

TFs\_to\_targets\_250\_250 Precision Recall, DoRothEA

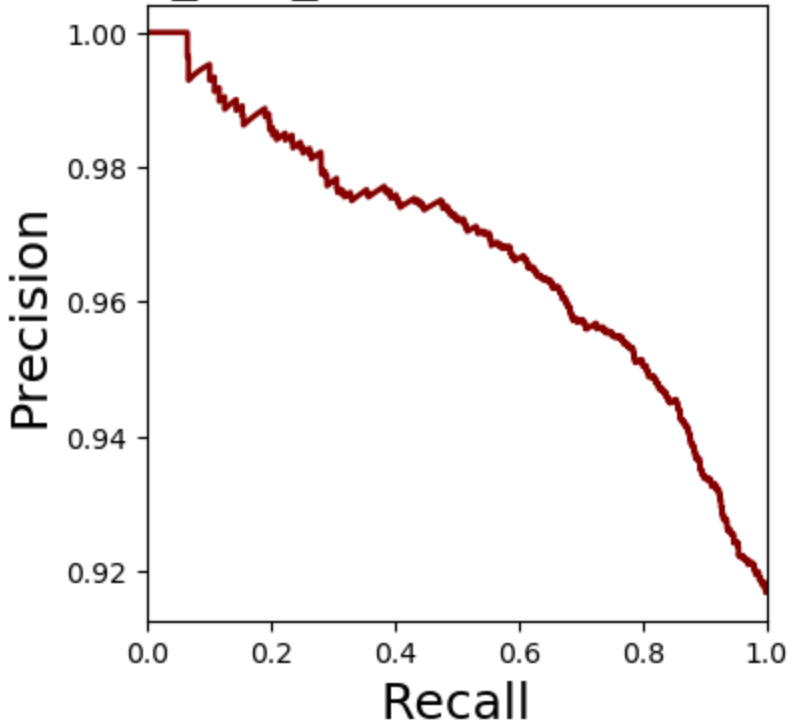

TFs\_to\_targets\_250\_250\_250 Precision Recall, TRRUST

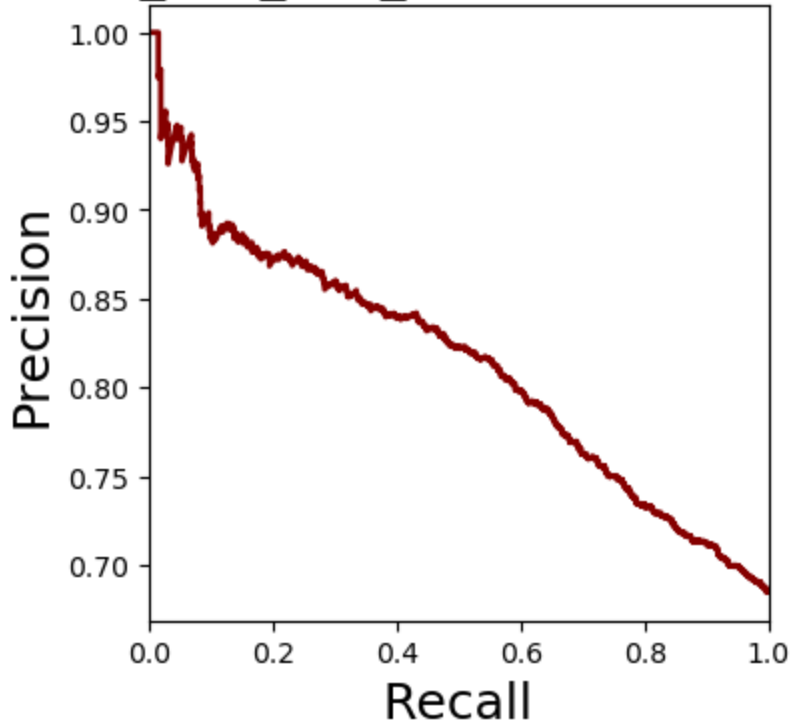

TFs\_to\_targets\_250\_250\_250 Precision Recall, DoRothEA

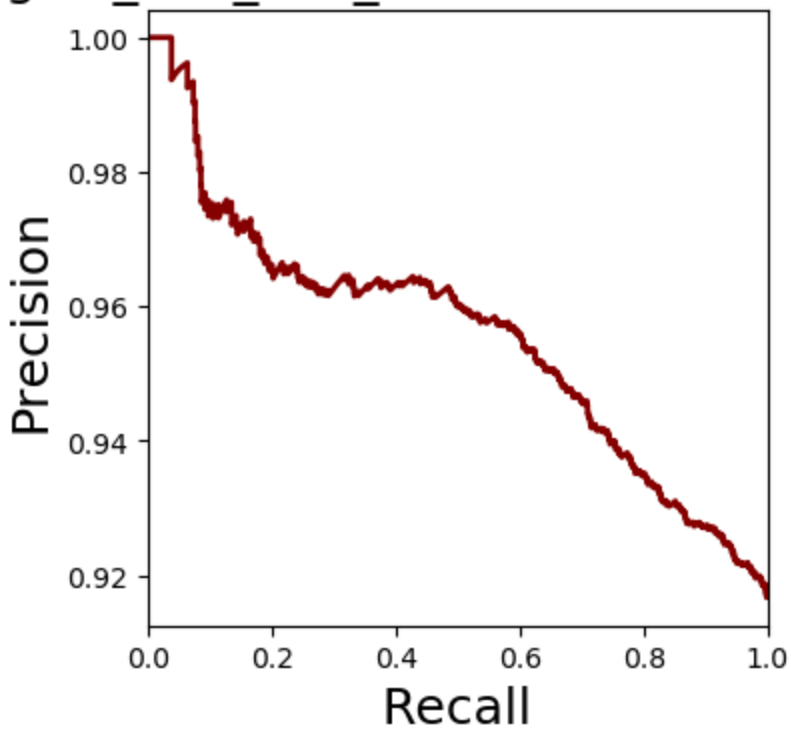

# TFs\_to\_targets\_100 Precision Recall, TRRUST

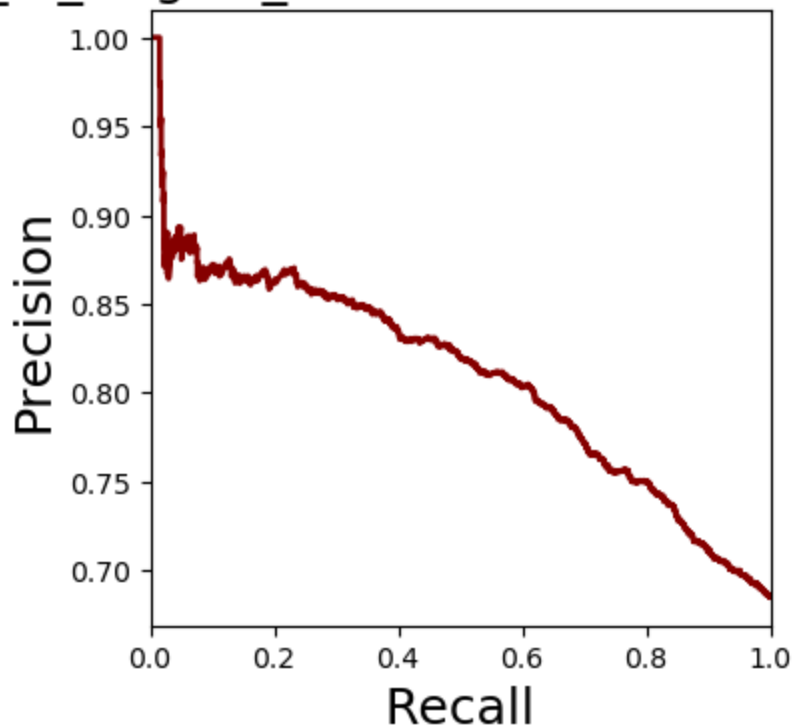



TFs\_to\_targets\_100 Precision Recall, DoRothEA

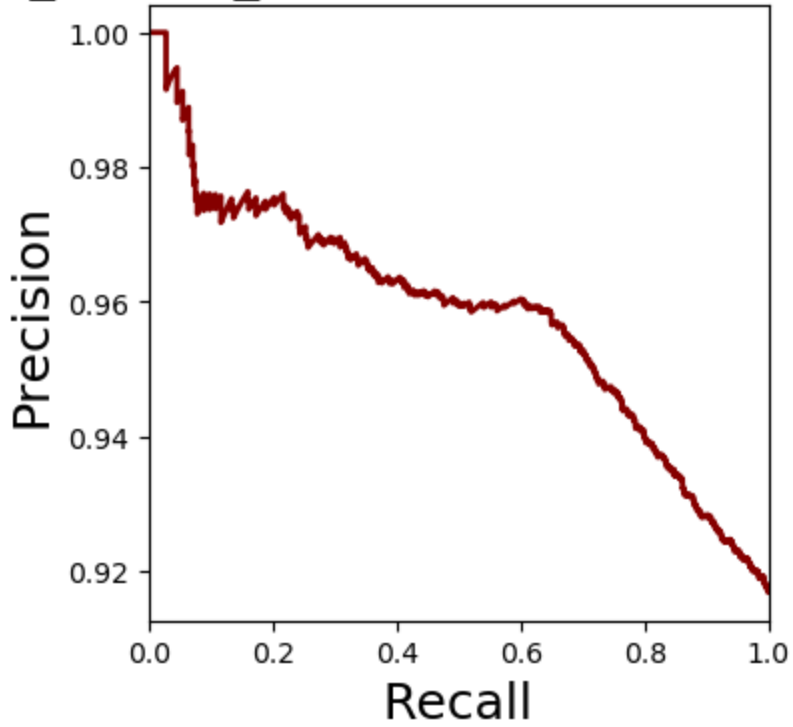

# TFs\_to\_targets\_100\_100 Precision Recall, TRRUST

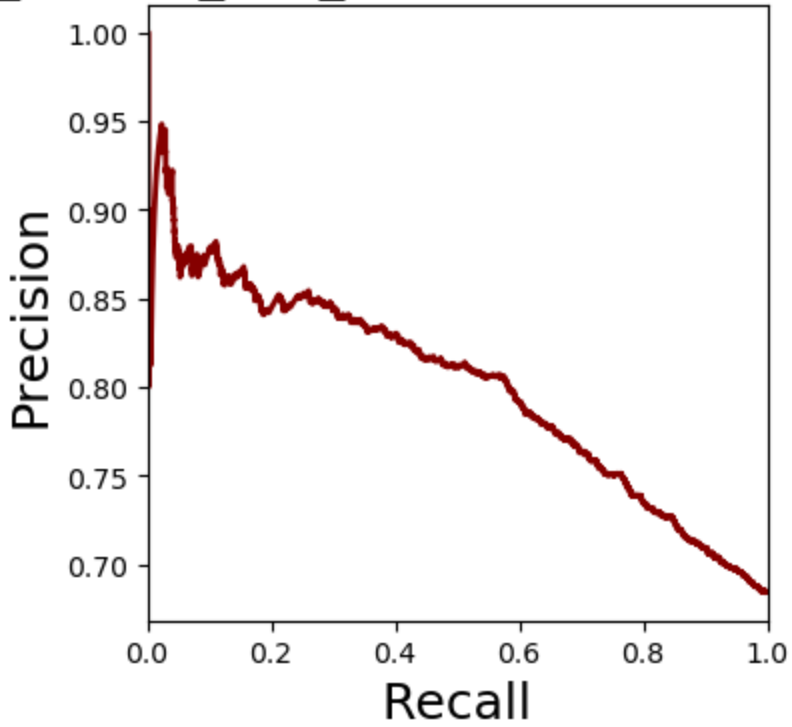

TFs\_to\_targets\_100\_100 Precision Recall, DoRothEA

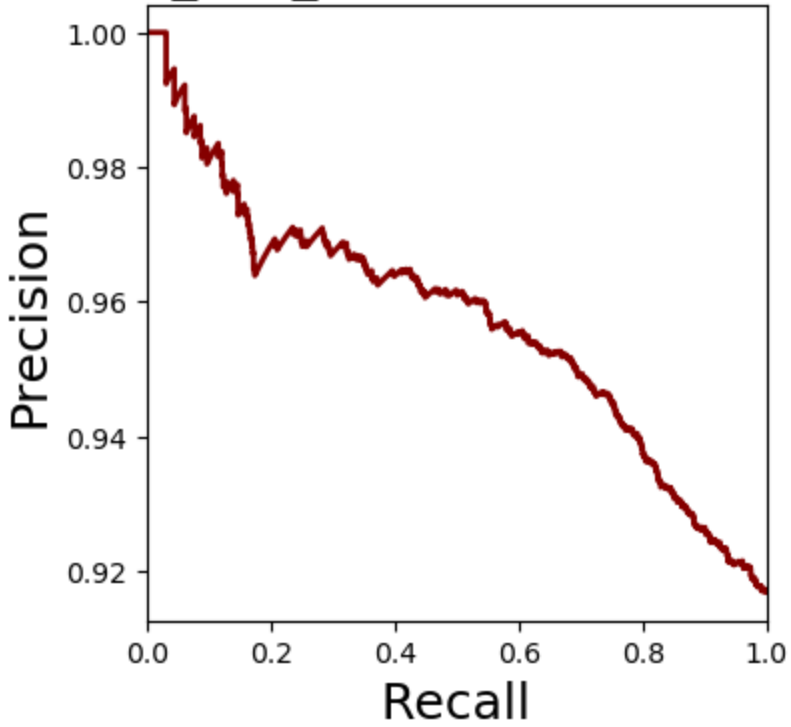

TFs\_to\_targets\_100\_100\_100 Precision Recall, TRRUST

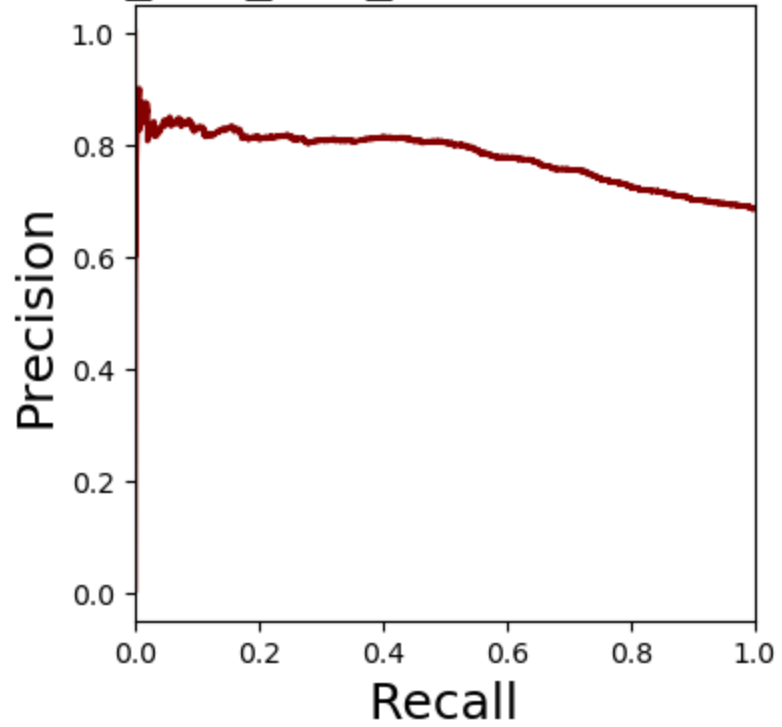

TFs\_to\_targets\_100\_100\_100 Precision Recall, DoRothEA

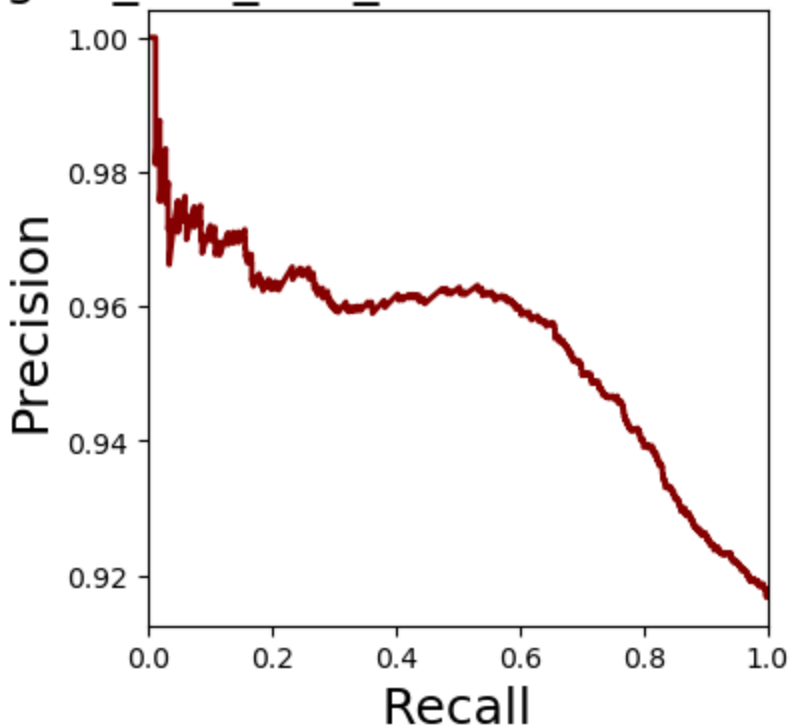

# TFs\_to\_targets\_50 Precision Recall, TRRUST

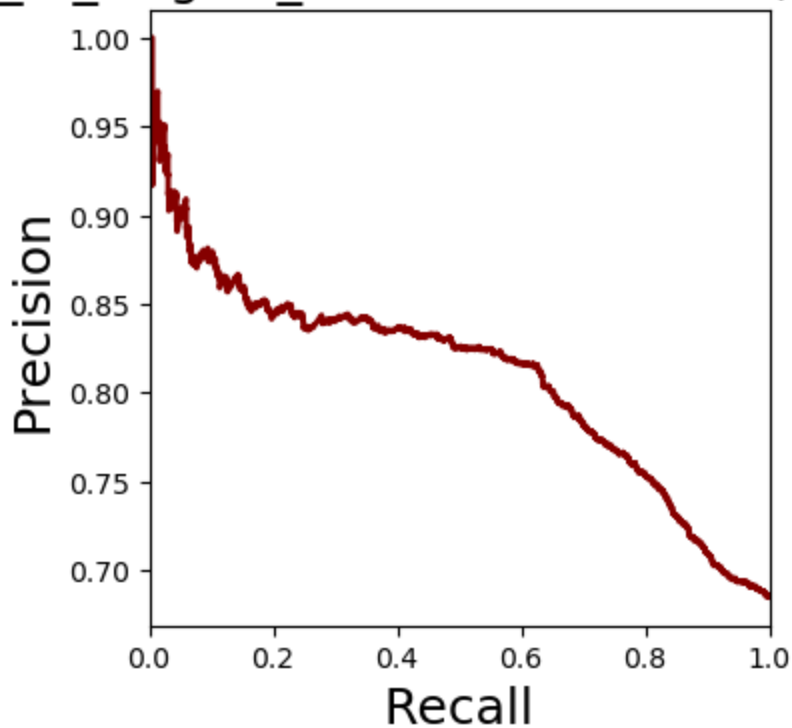

TFs\_to\_targets\_50 Precision Recall, DoRothEA

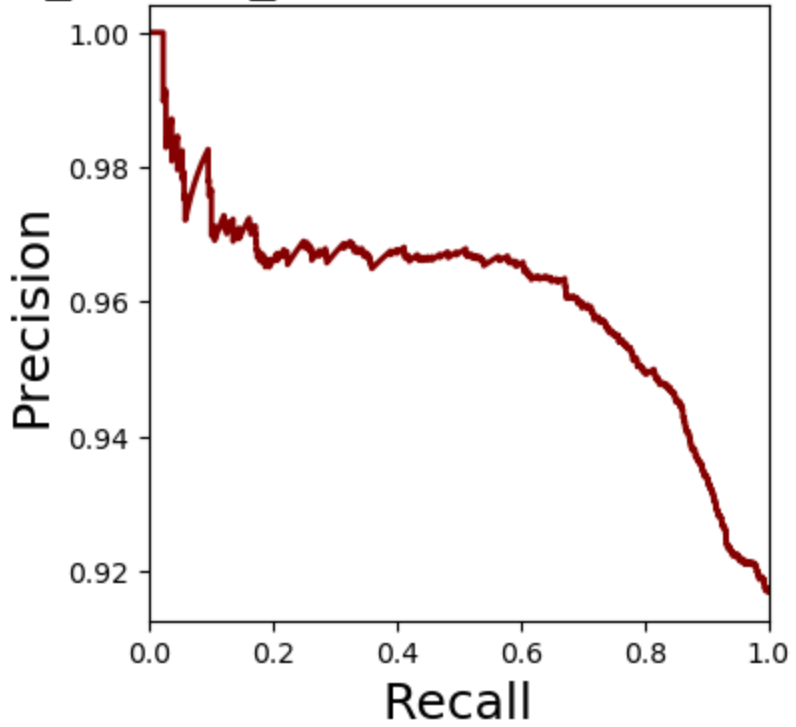

TFs\_to\_targets\_50\_50 Precision Recall, TRRUST

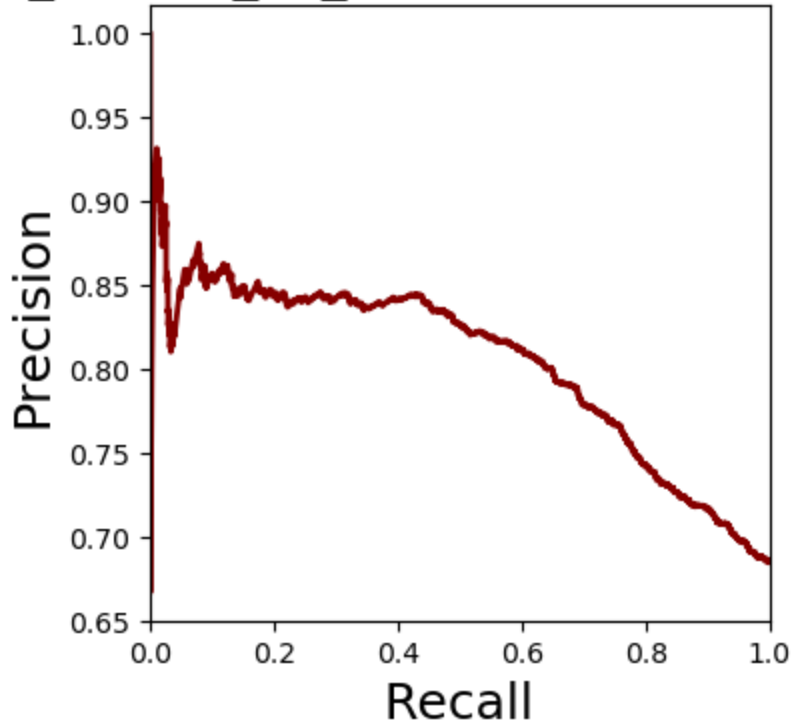



TFs\_to\_targets\_50\_50 Precision Recall, DoRothEA

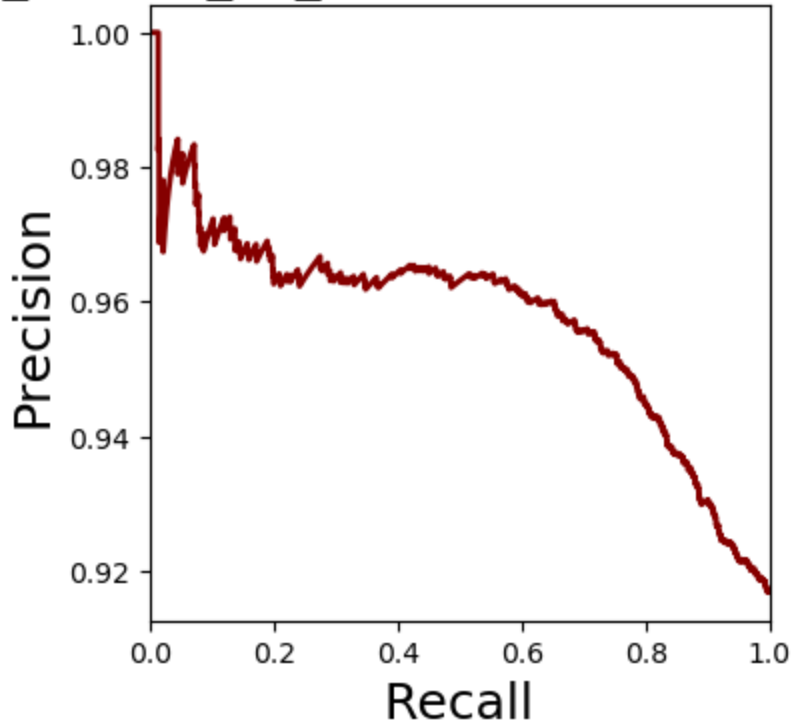

TFs\_to\_targets\_50\_50\_50 Precision Recall, TRRUST

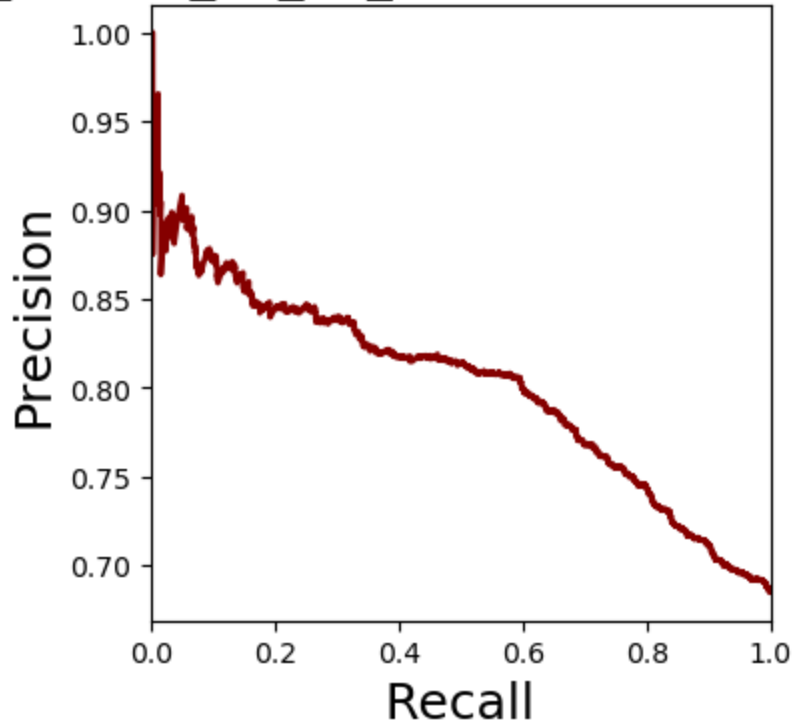

TFs\_to\_targets\_50\_50\_50 Precision Recall, DoRothEA

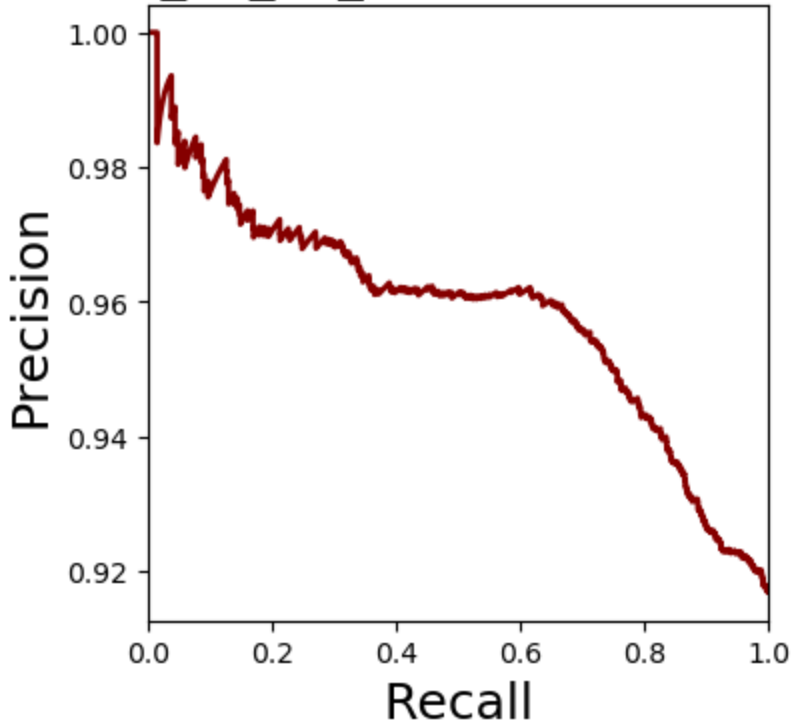

## Supplementary material 3: Hierarchical structures of TF inputs are robust between models

For each of the models, we performed a backward-selection algorithm on the TFs (Methods) to rank the TFs according to importance when predicting target gene expression. These models were trained completely independently, and to analyse how robust TF-to-target interactions identified by the models were, i.e. how consistent the model approach was, we compared the similarities of removal order between the models. We measured similarity as correlation between the respective step at which each TF was removed, with one correlation between each model pair (Supplementary Figure 1).

We found that the models that had a high compression, i.e. few hidden nodes in each layer, were less similar in the order TFs were removed. Nevertheless, all TF-ranking comparisons had highly significant Spearman correlations (highest  $P < 10e-118$ ,  $\rho=0.53$ ).

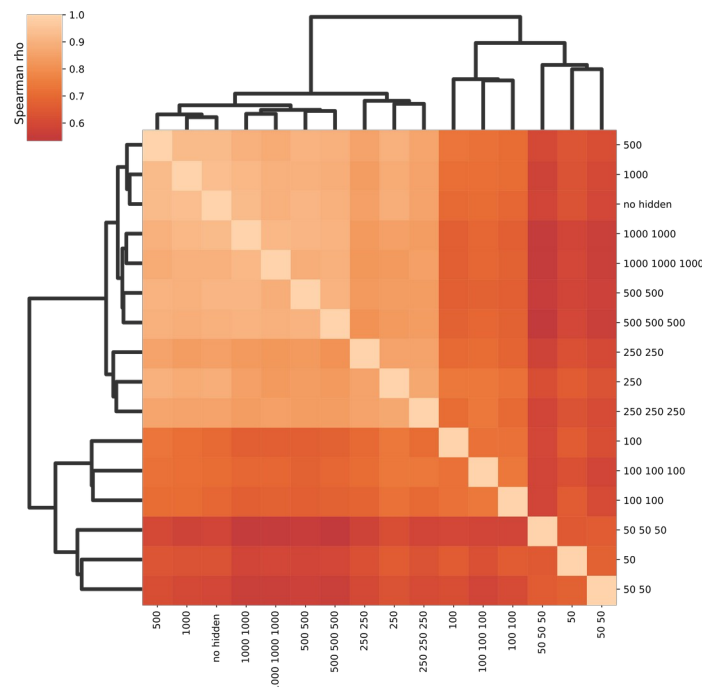

**Supplementary Figure 1:** Consistency of TF-removals between models. We found the iteration at which TF was removed to be highly consistent between models, indicating a robustness in how TFs are used to predict target genes.
